# Supplementary material for: Regioselective Claisen–Schmidt Adduct of 2-Undecanone from Houttuynia cordata Thunb as Insecticide/Repellent against Solenopsis invicta and Repositioning Plant Fungicides against Colletotrichum fragariae
Source: MDPI journal article supplement (doi:10.3390/molecules28166100), 2023-08-17
Supplement: s1 [file s1]

# Regioselective Claisen–Schmidt Adduct of 2-Undecanone from *Houttuynia cordata* Thunb as Insecticide/Repellent against *Solenopsis invicta* and Repositioning Plant Fungicides against *Colletotrichum fragariae*

Aigerim Kurmanbayeva <sup>1,2,†</sup>, Meirambek Ospanov <sup>1,†</sup>, Prabin Tamang <sup>3</sup>, Farhan Mahmood Shah <sup>1</sup>, Abbas Ali <sup>1</sup>, Zeyad M. A. Ibrahim <sup>4</sup>, Charles L. Cantrell <sup>3</sup>, Satmbekova Dinara <sup>2,5</sup>, Ubaidilla Datkhayev <sup>2,\*</sup>, Ikhlas A. Khan <sup>1</sup> and Mohamed A. Ibrahim <sup>1,\*</sup>

1 National Center for Natural Products Research, School of Pharmacy, University of Mississippi, University, MS 38677, USA; aigerimkurmanbaeva14@gmail.com (A.K.); mospanov@olemiss.edu (M.O.); fshah@olemiss.edu (F.M.S.); aali@olemiss.edu (A.A.); ikhan@olemiss.edu (I.A.K.)

2 Department of Organization, Management and Economics of Pharmacy and Clinical Pharmacy, School of Pharmacy, S.D. Asfendiyarov Kazakh National Medical University, Almaty 050012, Kazakhstan; dskanatovna@gmail.com

3 USDA-ARS, Natural Products Utilization Research Unit, University, MS 38677, USA; prabin.tamang@usda.gov (P.T.); charles.cantrell@usda.gov (C.L.C.)

4 General Studies, University of Mississippi, University, MS 38677, USA; zmibrahi@go.olemiss.edu

5 The National Academy of Science, Republic of Kazakhstan, Almaty 050010, Kazakhstan

\* Correspondence: u.datkhayev@kaznmu.kz (U.D.); mmibrahi@olemiss.edu (M.A.I.)

† These authors contributed equally to this work.

# Supplementary Information

| Page Number | Figure                                    |
|-------------|-------------------------------------------|
| Figure S1   | $^1\text{H}$ NMR spectrum of <b>1</b>     |
| Figure S2   | $^{13}\text{C}$ NMR spectrum of <b>1</b>  |
| Figure S3   | Dept-135 NMR spectrum of <b>1</b>         |
| Figure S4   | $^1\text{H}$ NMR spectrum of <b>2a</b>    |
| Figure S5   | $^{13}\text{C}$ NMR spectrum of <b>2a</b> |
| Figure S6   | Dept-135 NMR spectrum of <b>2a</b>        |
| Figure S7   | HRMS of <b>2a</b>                         |
| Figure S8   | $^1\text{H}$ NMR spectrum of <b>2b</b>    |
| Figure S9   | $^{13}\text{C}$ NMR spectrum of <b>2b</b> |
| Figure S10  | Dept-135 NMR spectrum of <b>2b</b>        |
| Figure S11  | HRMS of <b>2b</b>                         |
| Figure S12  | $^1\text{H}$ NMR spectrum of <b>2c</b>    |
| Figure S13  | $^{13}\text{C}$ NMR spectrum of <b>2c</b> |
| Figure S14  | Dept-135 NMR spectrum of <b>2c</b>        |
| Figure S15  | HRMS of <b>2c</b>                         |
| Figure S16  | $^1\text{H}$ NMR spectrum of <b>2d</b>    |

## Supplementary Information

| Page Number | Figure                                    |
|-------------|-------------------------------------------|
| Figure S17  | $^{13}\text{C}$ NMR spectrum of <b>2d</b> |
| Figure S18  | Dept-135 NMR spectrum of <b>2d</b>        |
| Figure S19  | HRMS of <b>2d</b>                         |
| Figure S20  | $^1\text{H}$ NMR spectrum of <b>2e</b>    |
| Figure S21  | $^{13}\text{C}$ NMR spectrum of <b>2e</b> |
| Figure S22  | Dept-135 NMR spectrum of <b>2e</b>        |
| Figure S23  | HRMS of <b>2e</b>                         |
| Figure S24  | $^1\text{H}$ NMR spectrum of <b>2f</b>    |
| Figure S25  | $^{13}\text{C}$ NMR spectrum of <b>2f</b> |
| Figure S26  | Dept-135 NMR spectrum of <b>2f</b>        |
| Figure S27  | HRMS of <b>2f</b>                         |

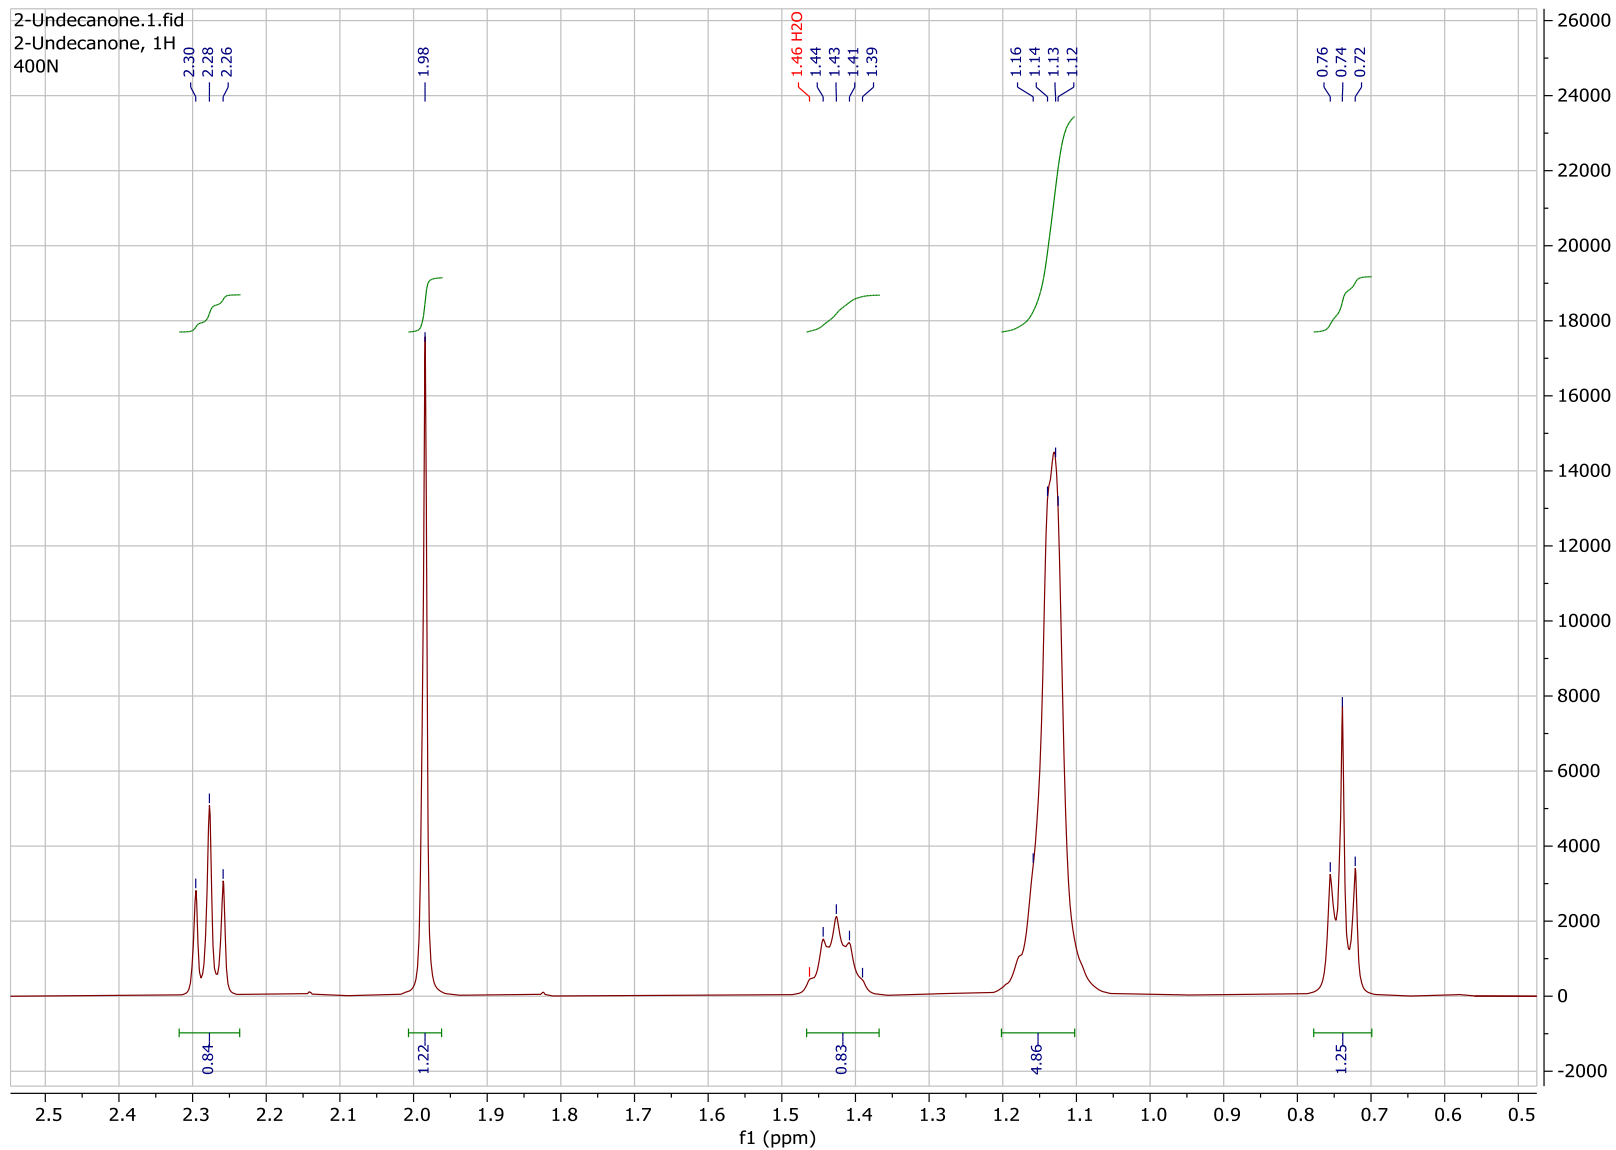

**Figure S1:**  $^1\text{H}$  NMR spectrum of **1** [400 MHz,  $\text{CDCl}_3$ ]

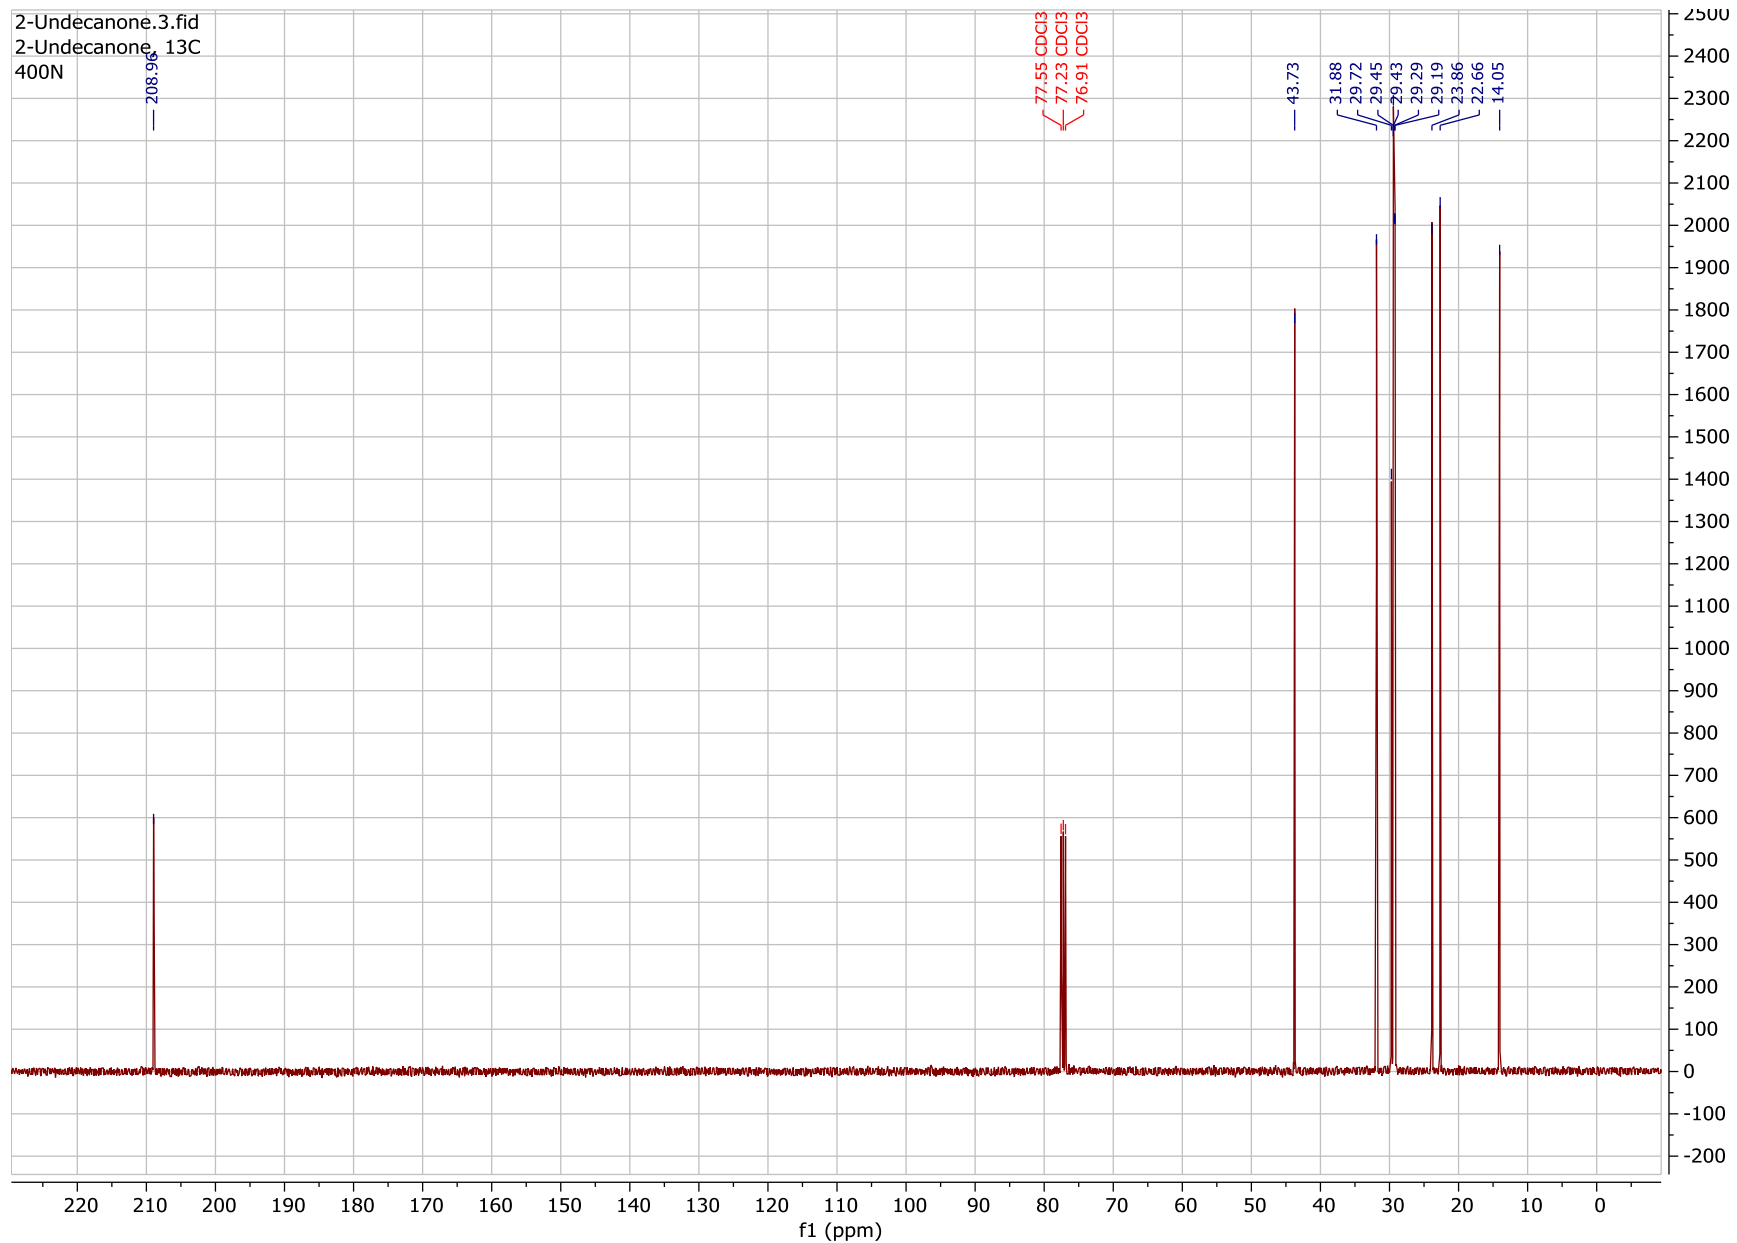

**Figure S2:**  $^{13}\text{C}$  NMR spectrum of **1** [100 MHz,  $\text{CDCl}_3$ ]

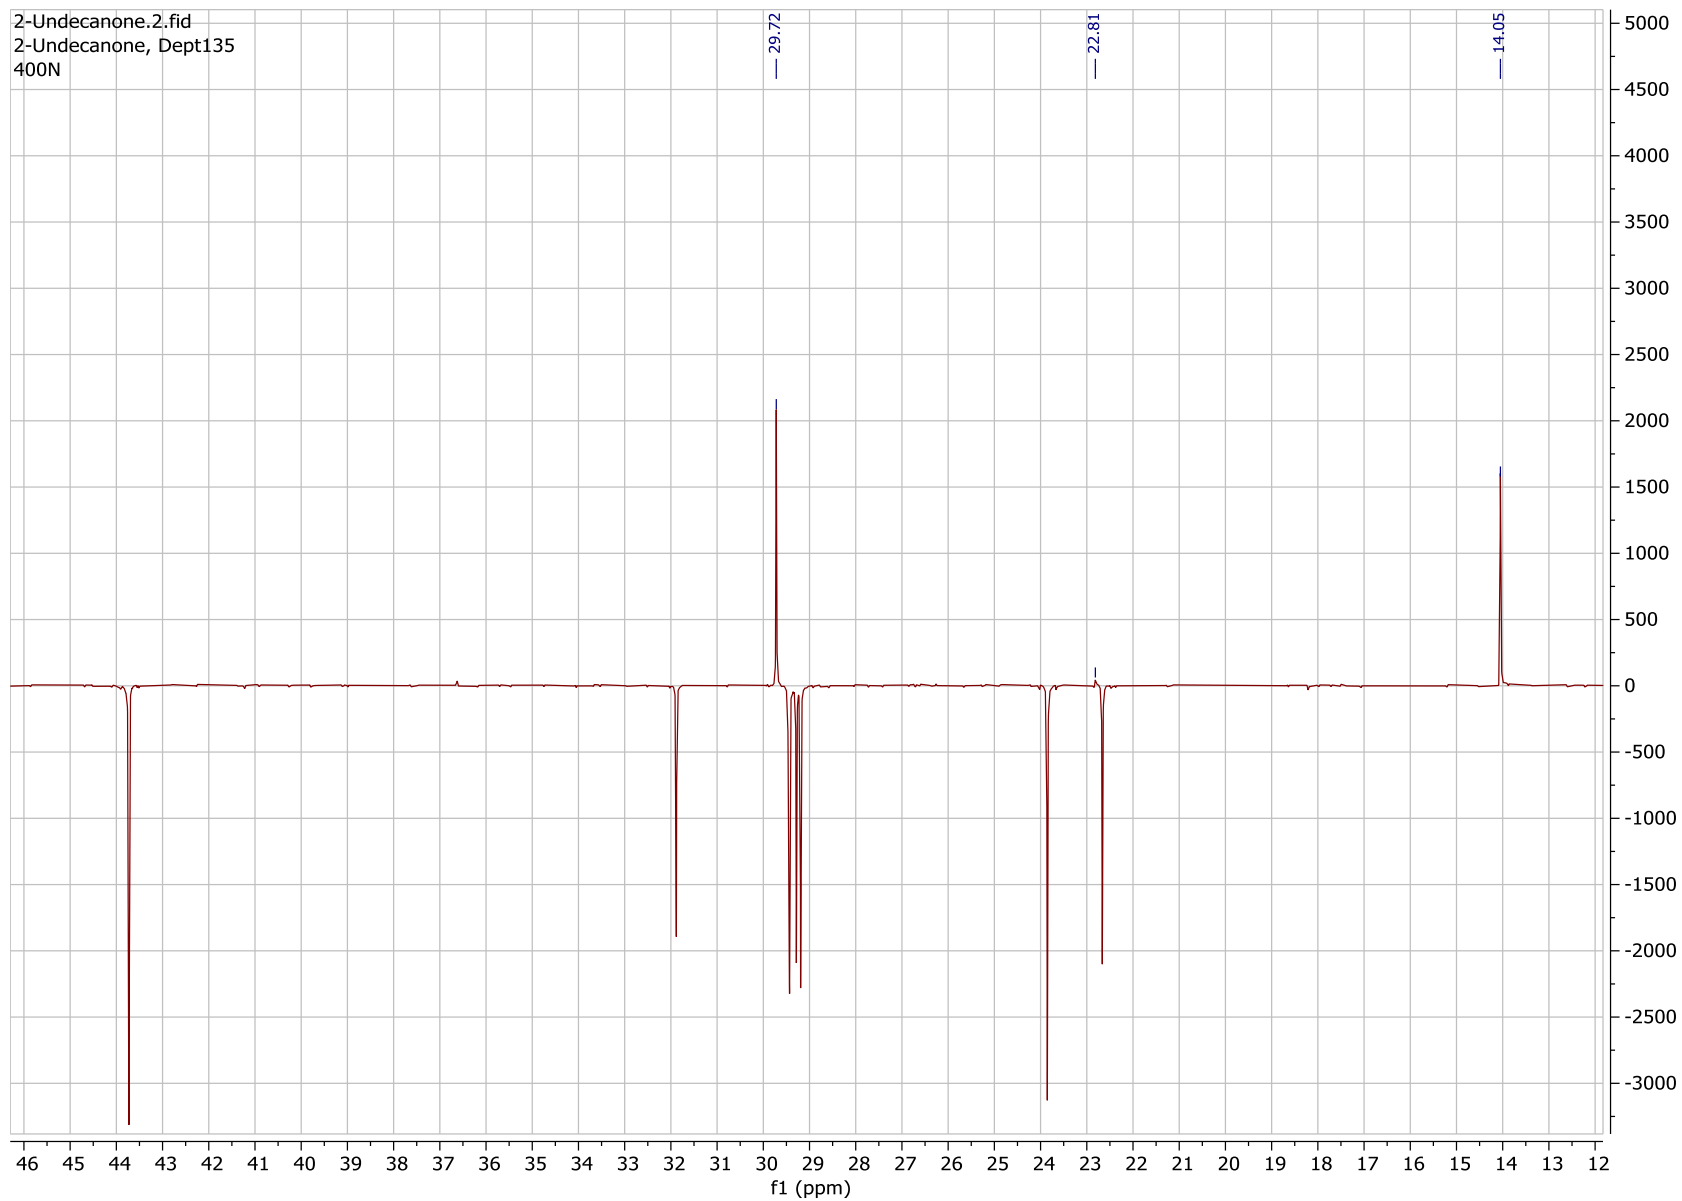

**Figure S3:** Dept-135 NMR spectrum of **1** [400 MHz, CDCl<sub>3</sub>]

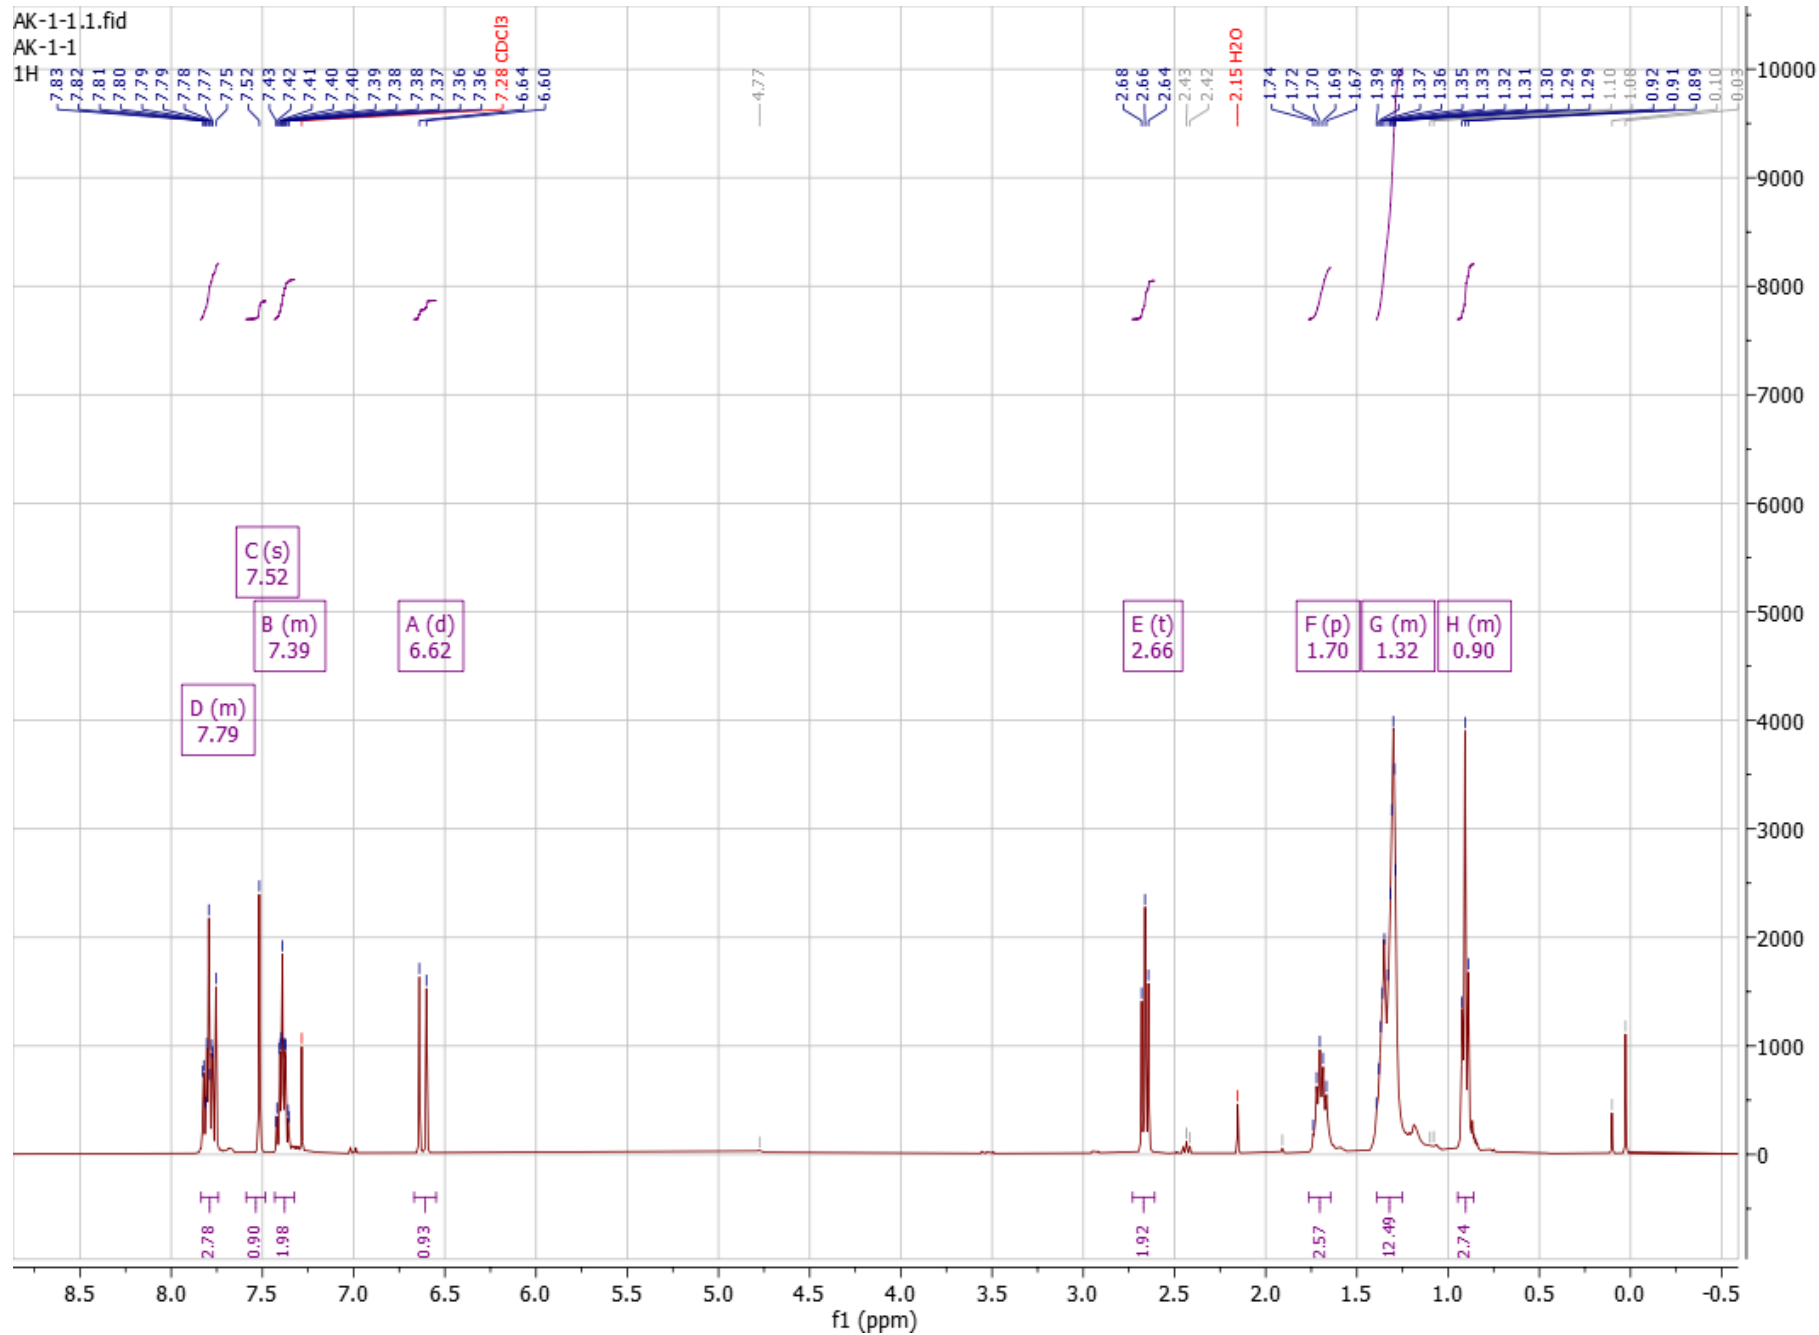

**Figure S4:** <sup>1</sup>H NMR spectrum of **2a** [400 MHz, CDCl<sub>3</sub>]

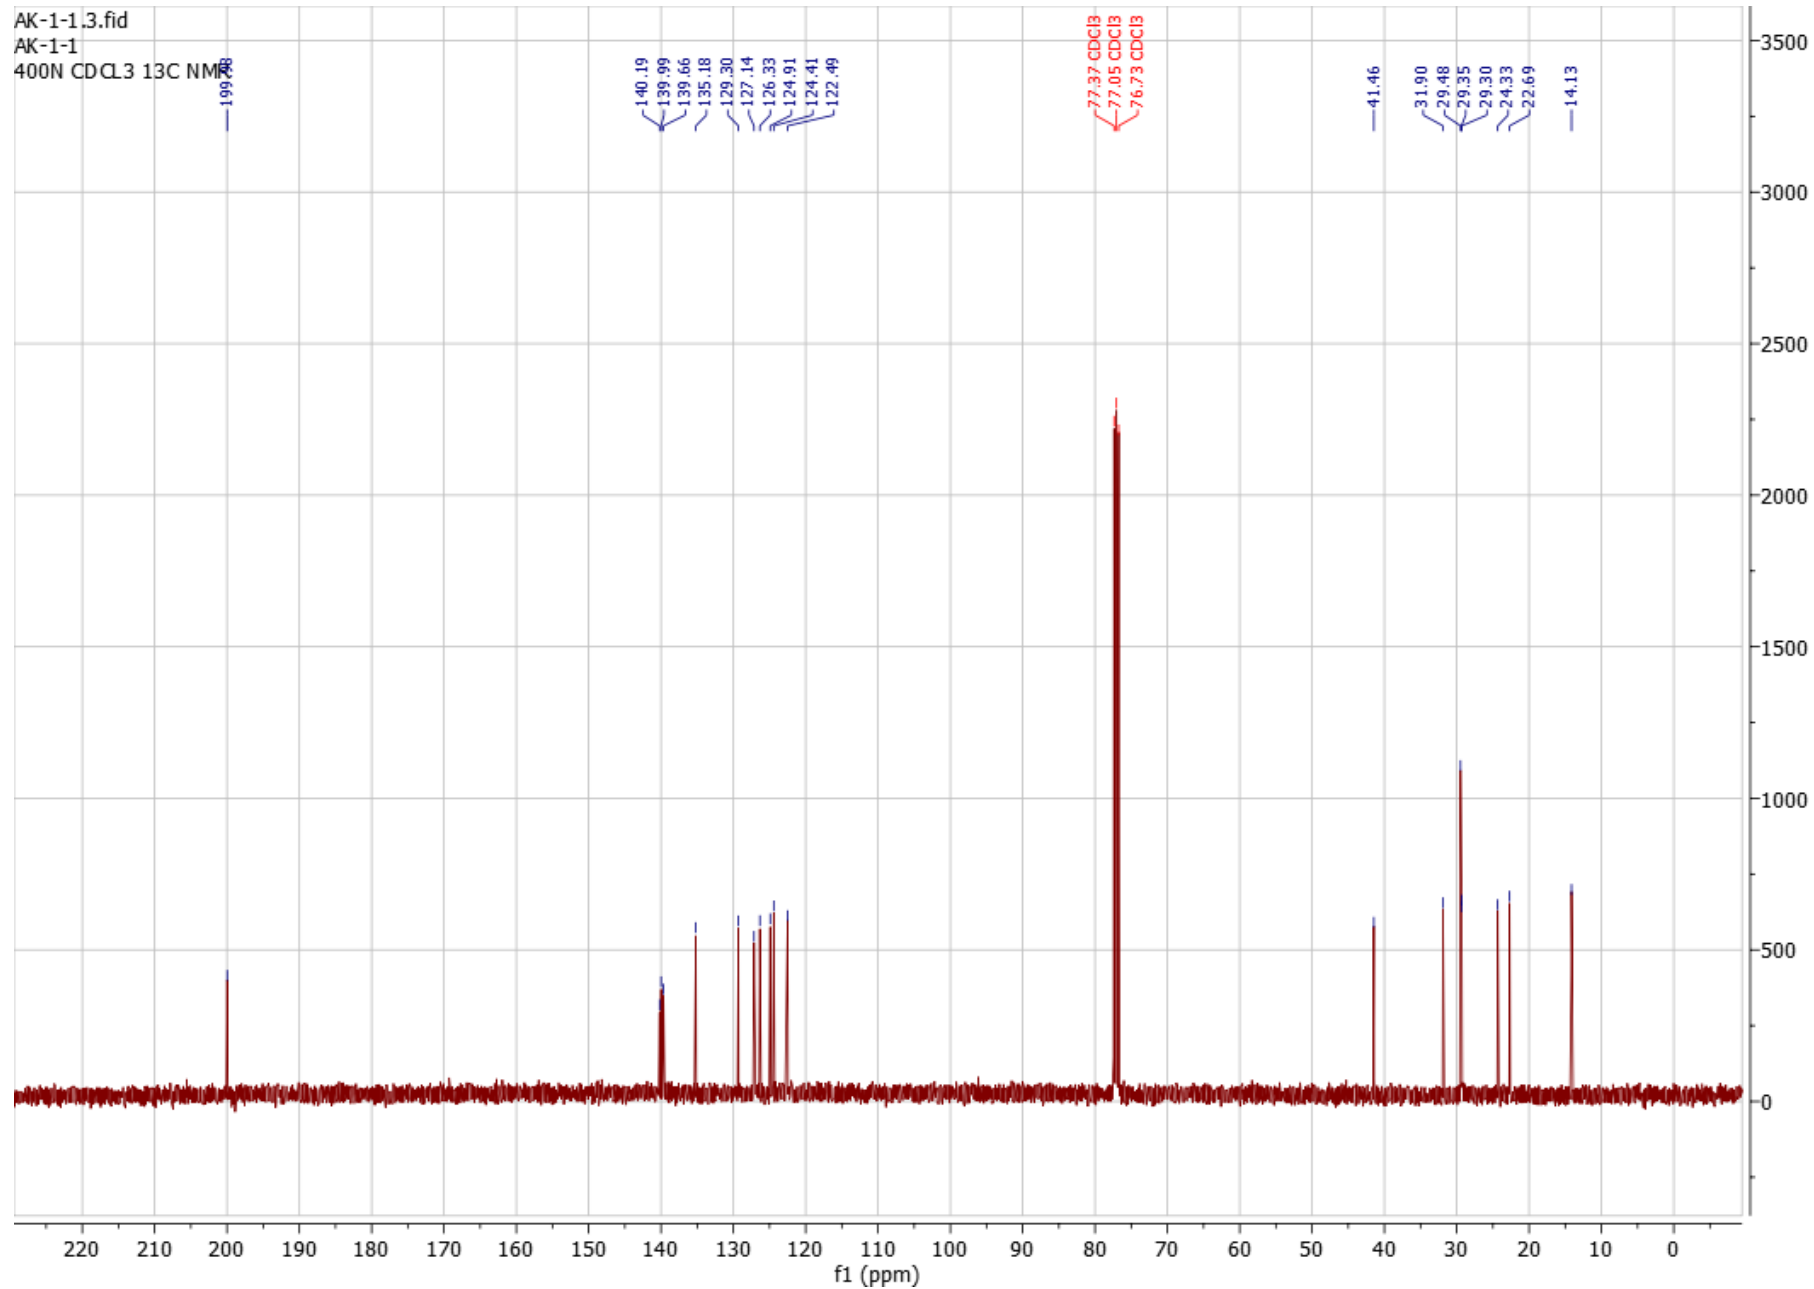

**Figure S5:** <sup>13</sup>C NMR spectrum of **2a** [100 MHz, CDCl<sub>3</sub>]



AK-1-1.2.fid  
AK-1-1  
400N CDCl<sub>3</sub> Dept135 NMR

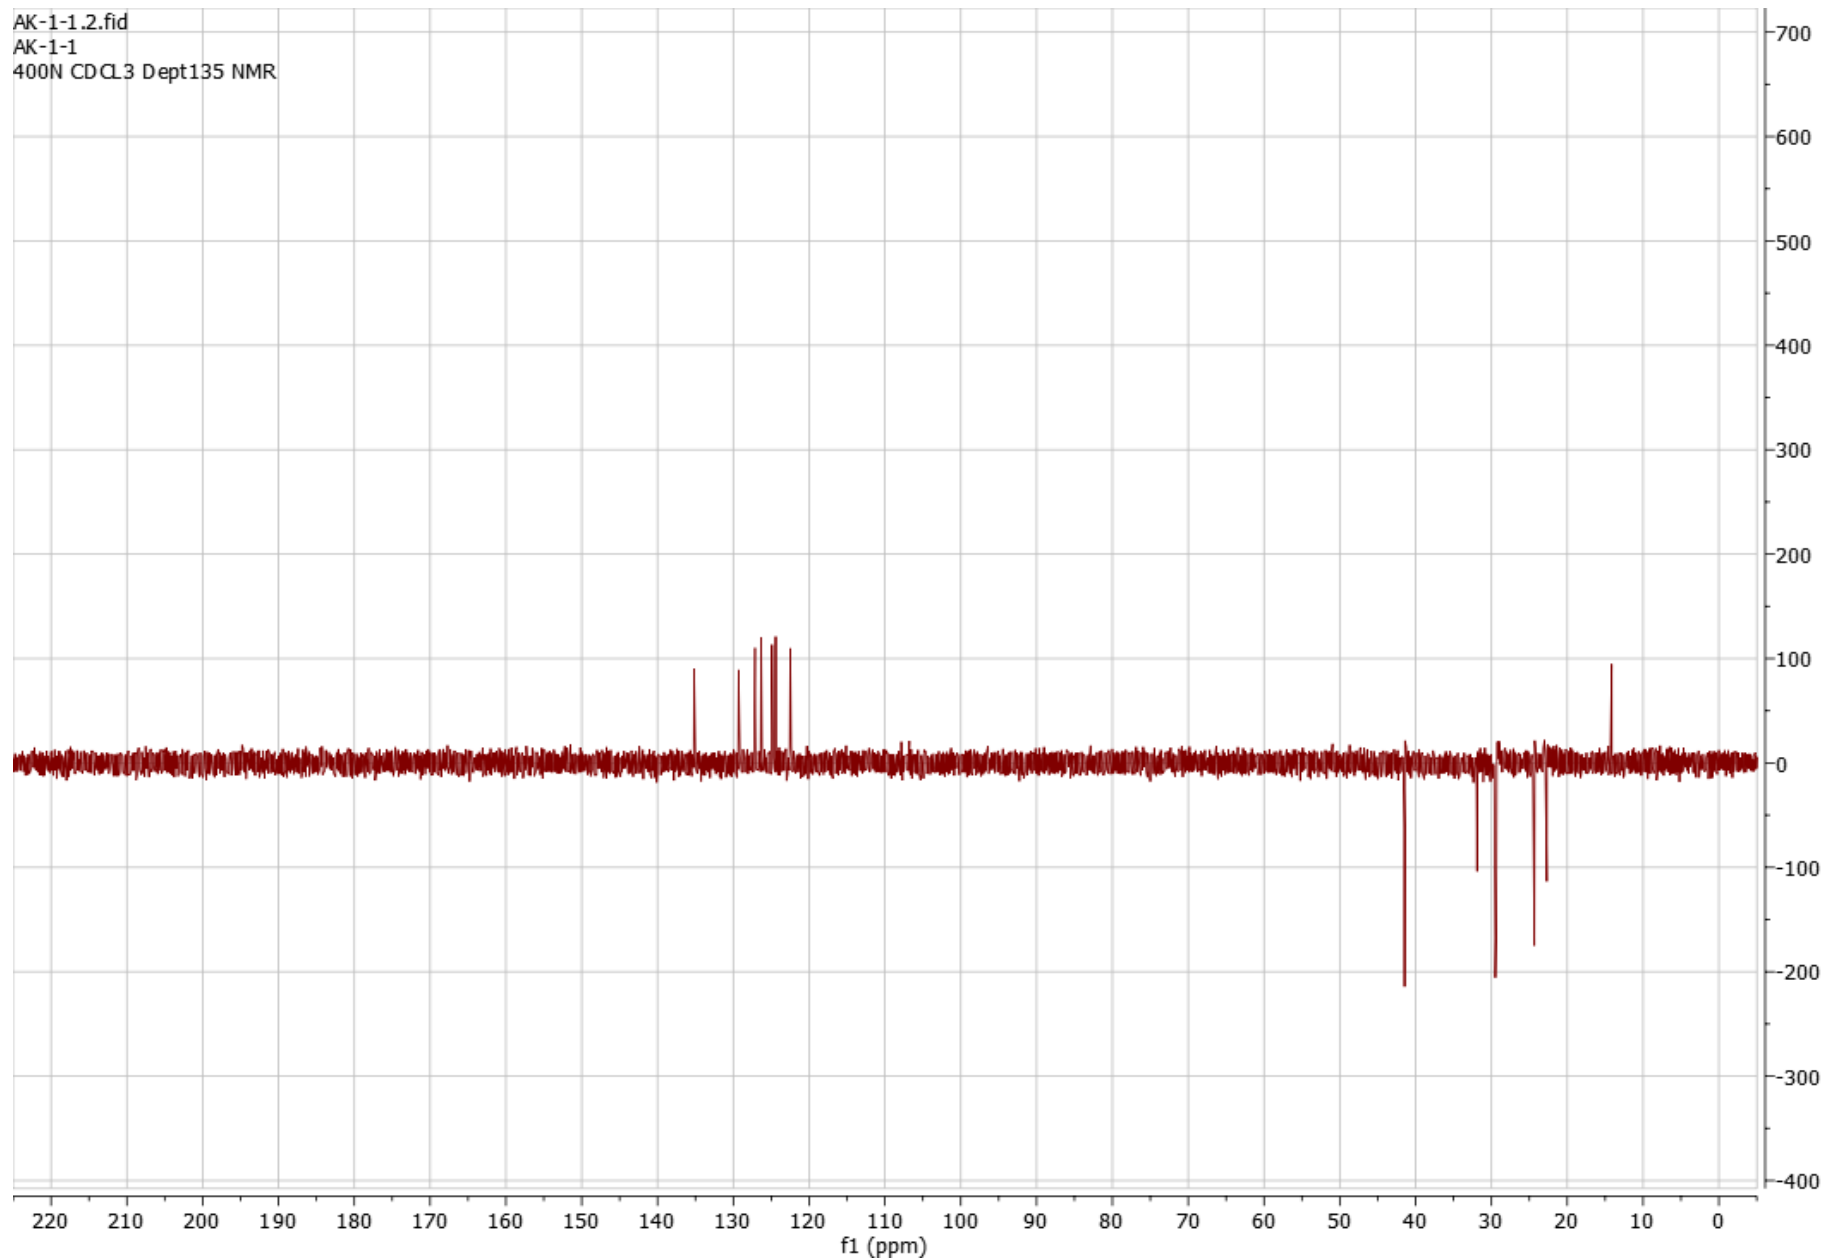

**Figure S6:** Dept-135 NMR spectrum of **2a** [400 MHz, CDCl<sub>3</sub>]

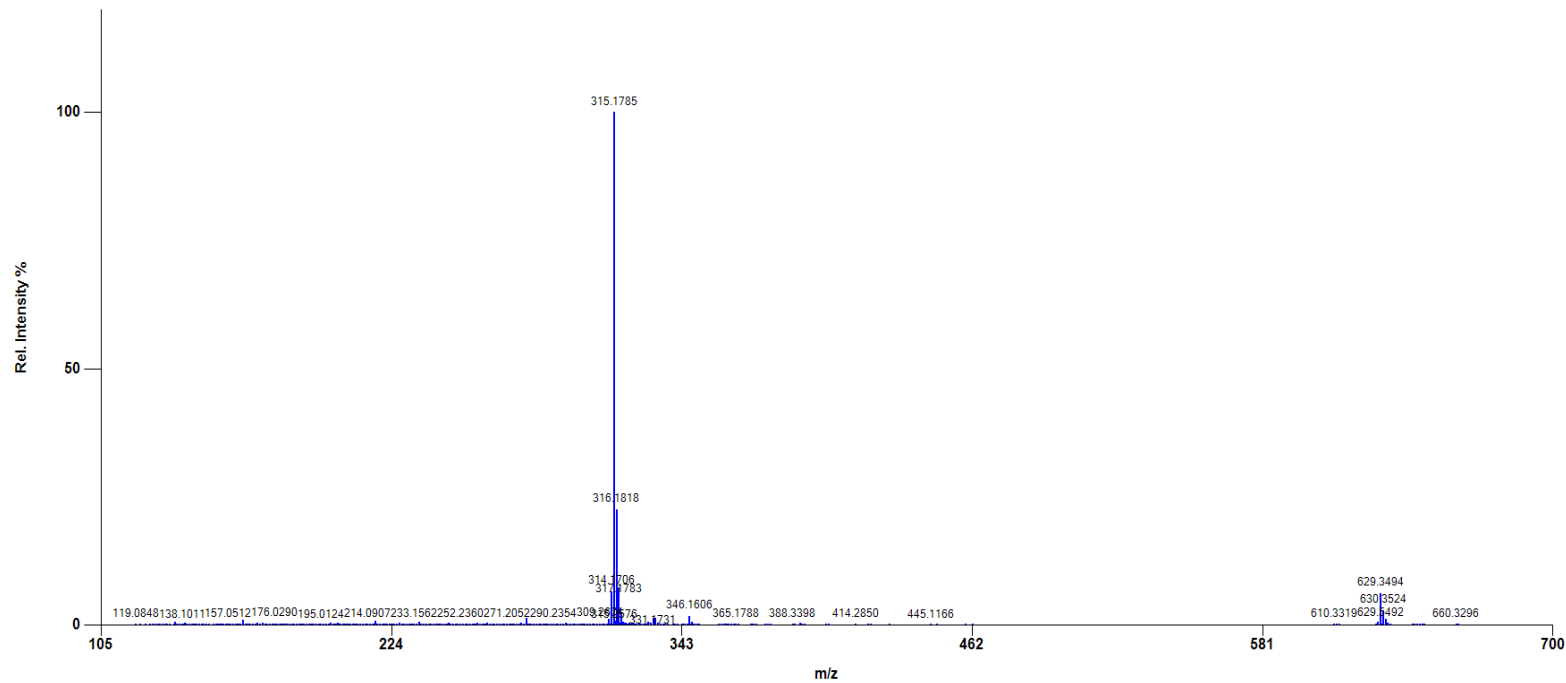

**Figure S7: HRMS of 2a**



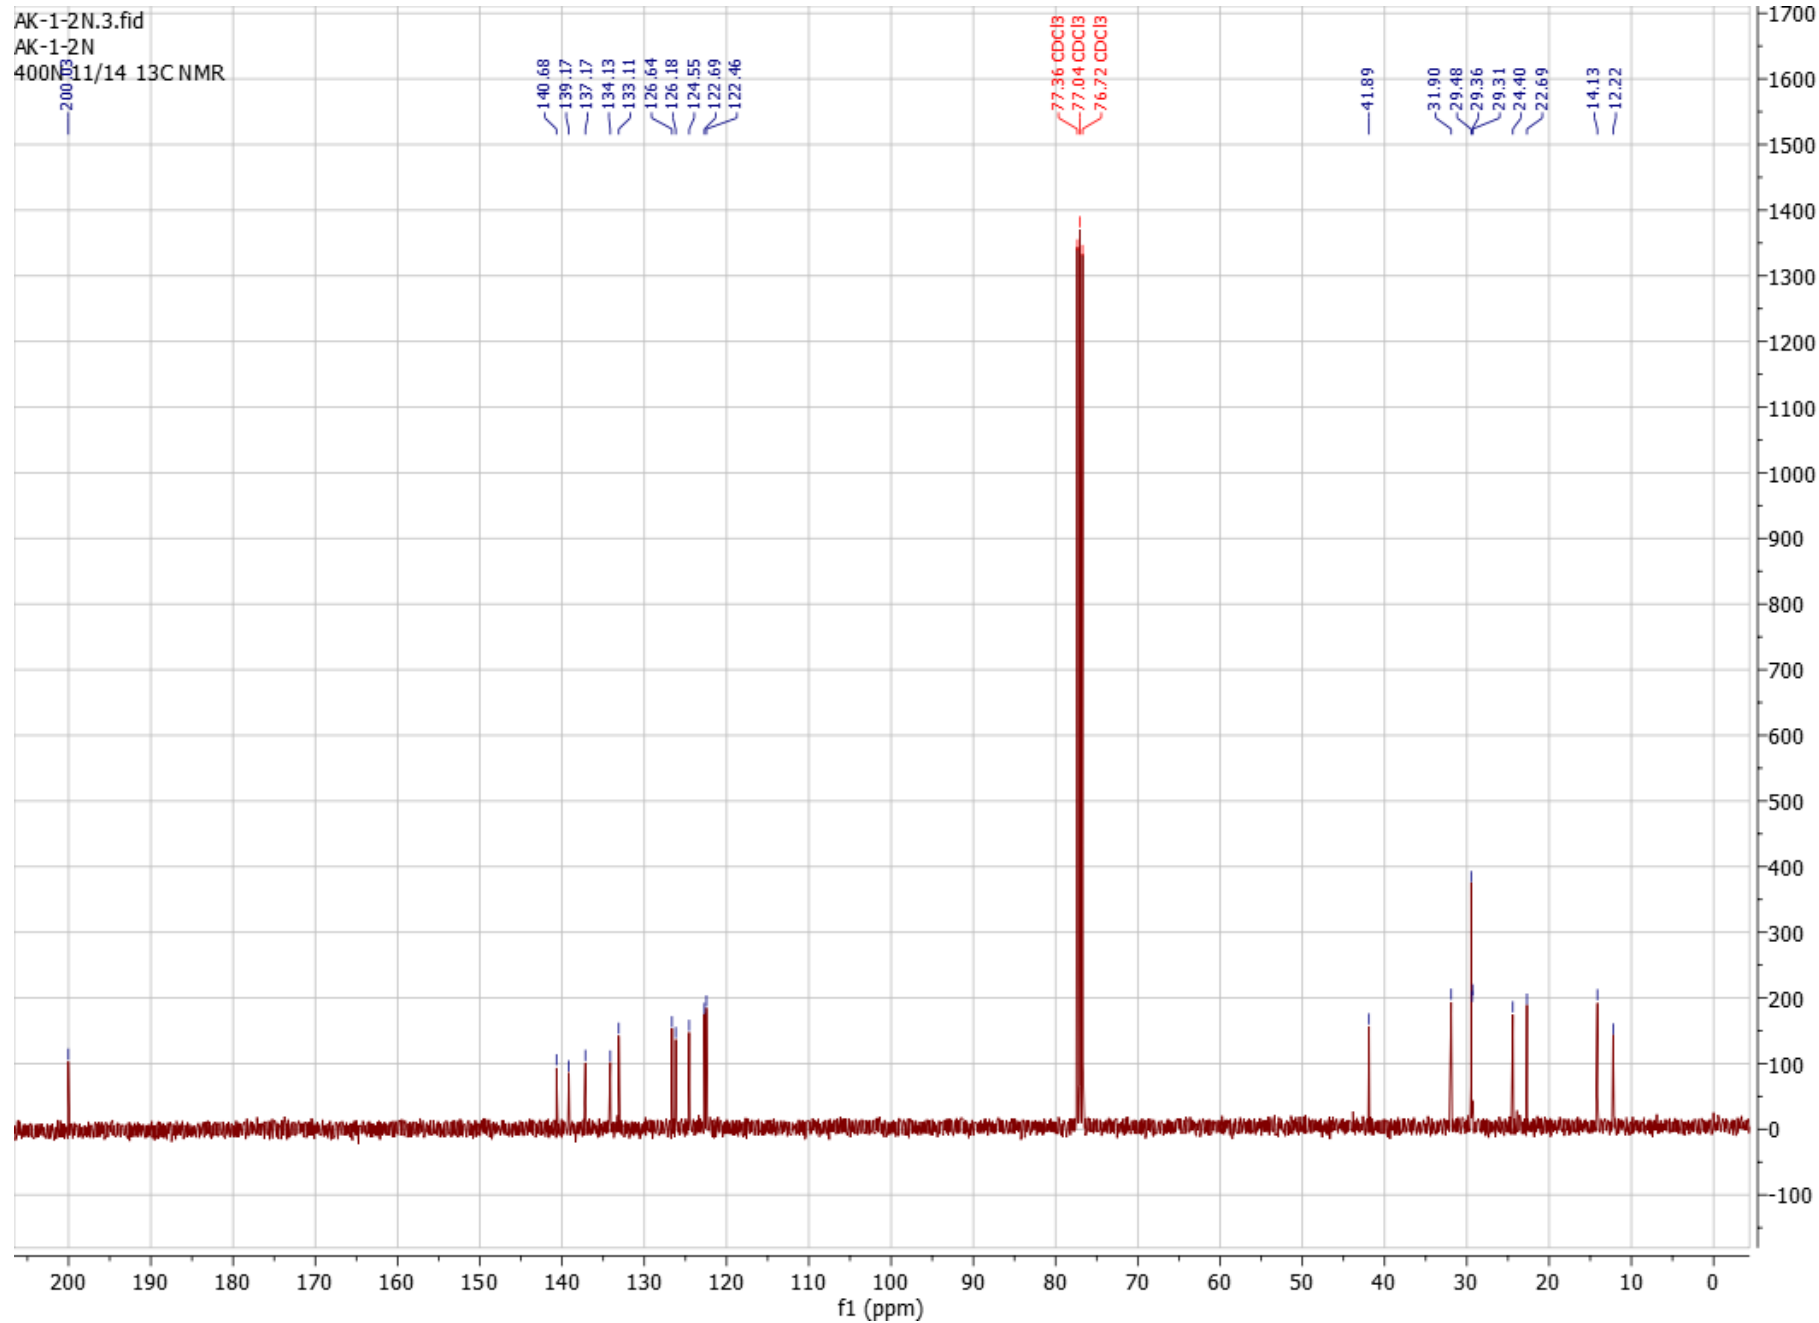

**Figure S9:**  $^{13}\text{C}$  NMR spectrum of **2b** [100 MHz,  $\text{CDCl}_3$ ]

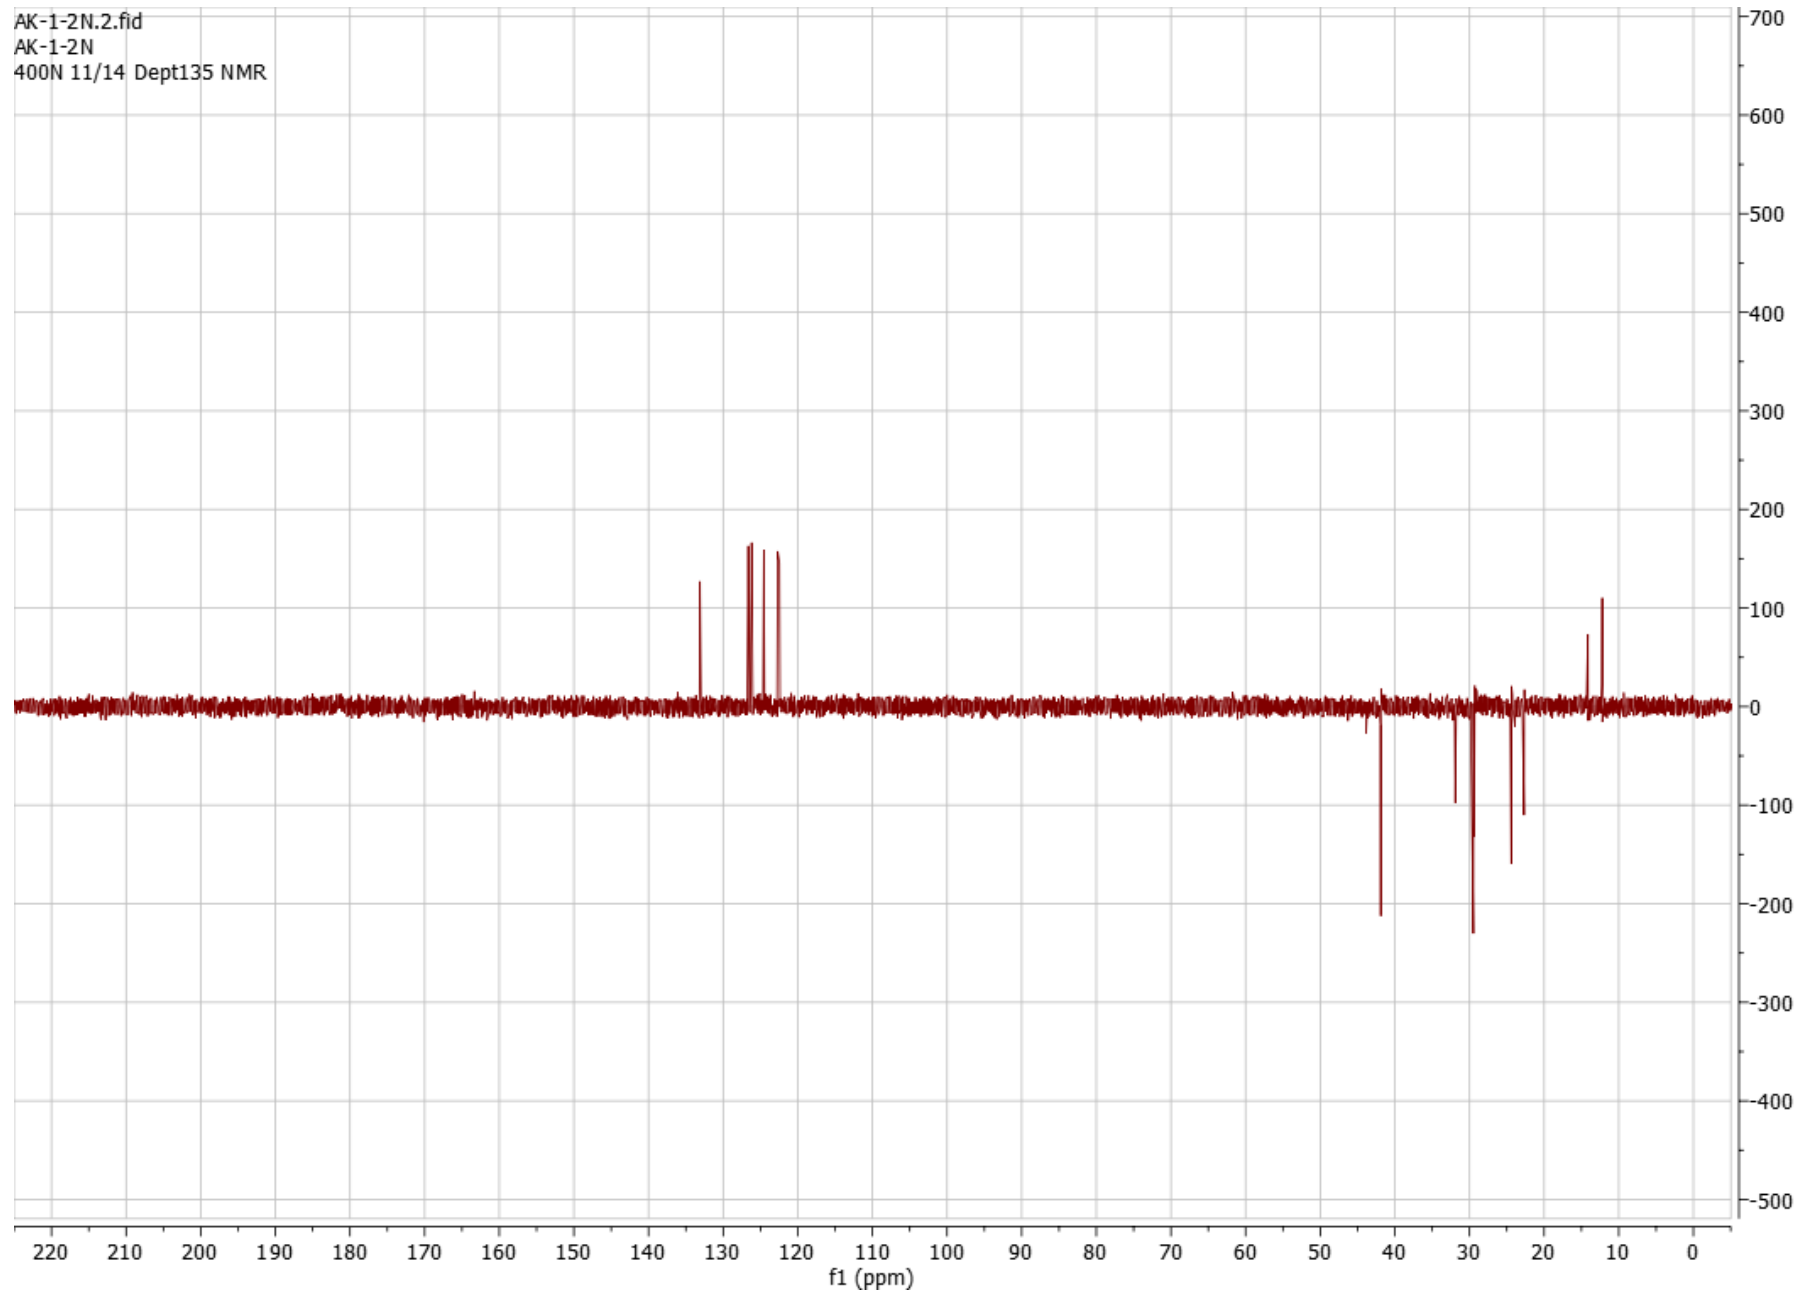

**Figure S10:** Dept-135 NMR spectrum of **2b** [400 MHz,  $\text{CDCl}_3$ ]

D:\msAxel@LP Data\Charles\_Cantrell\MI-AK-1-2 dartpos.txt

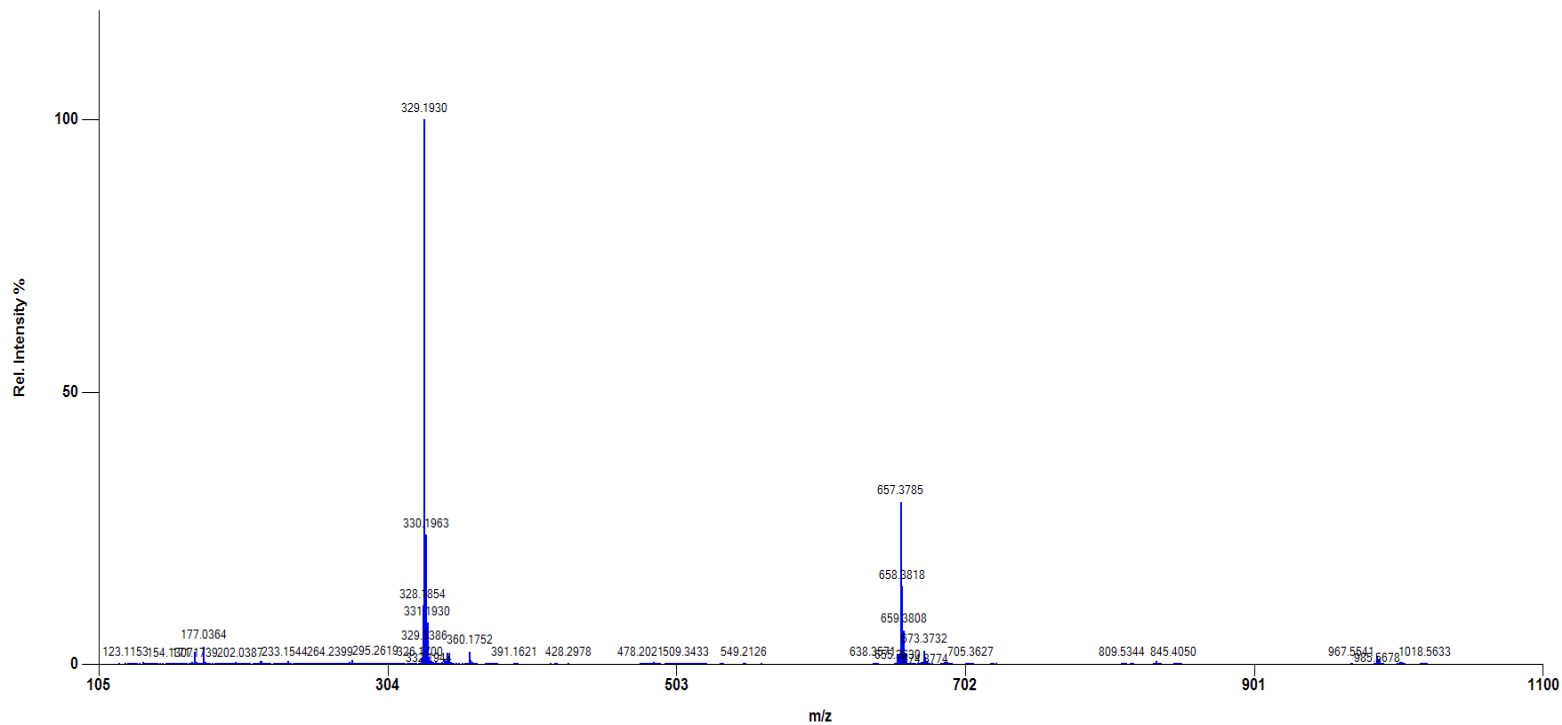

**Figure S11: HRMS of 2b**



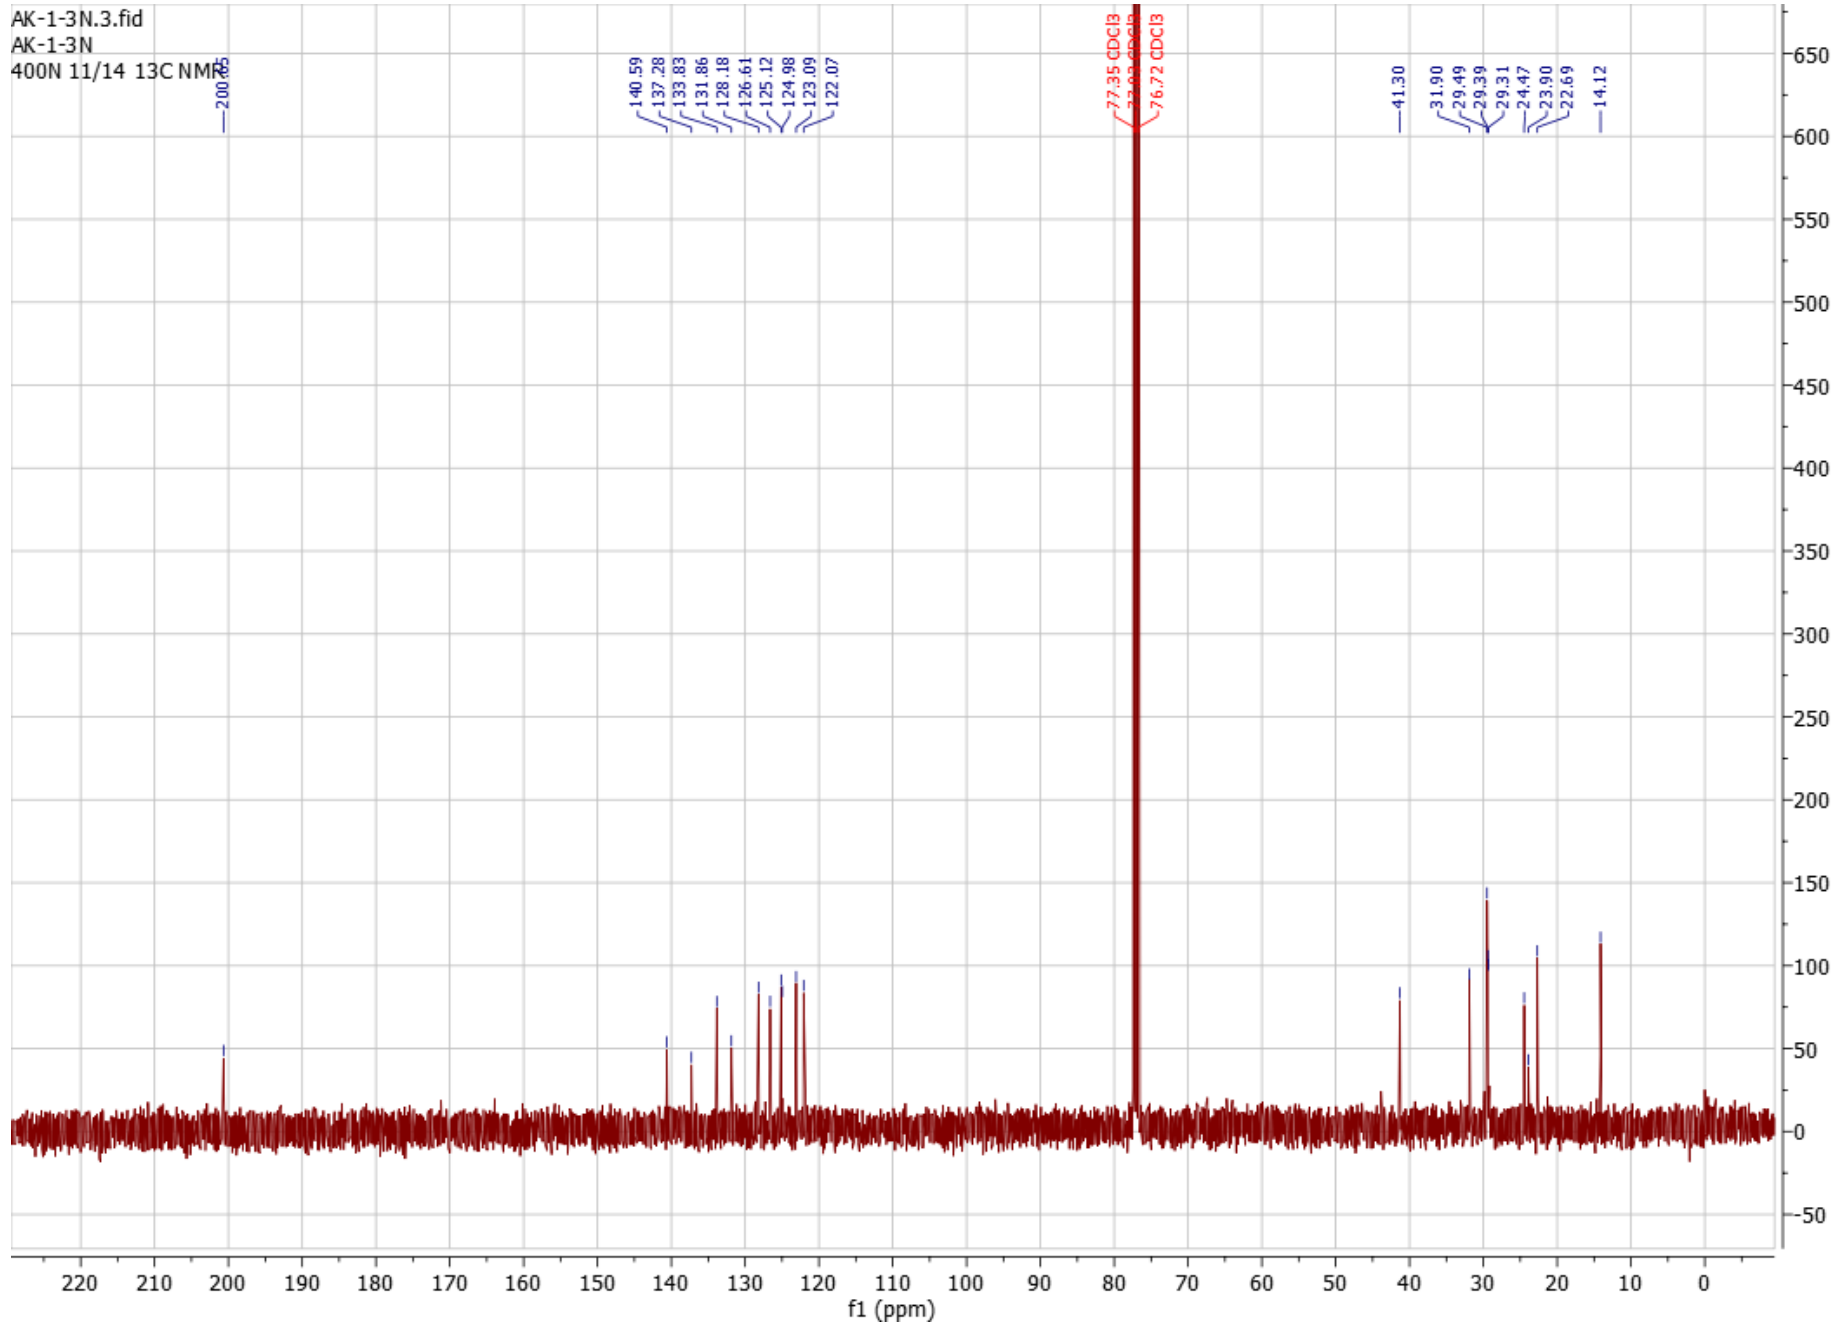

**Figure S13:**  $^{13}\text{C}$  NMR spectrum of **2c** [100 MHz,  $\text{CDCl}_3$ ]



AK-1-3N.2.fid  
AK-1-3N  
400N 11/14 Dept135 NMR

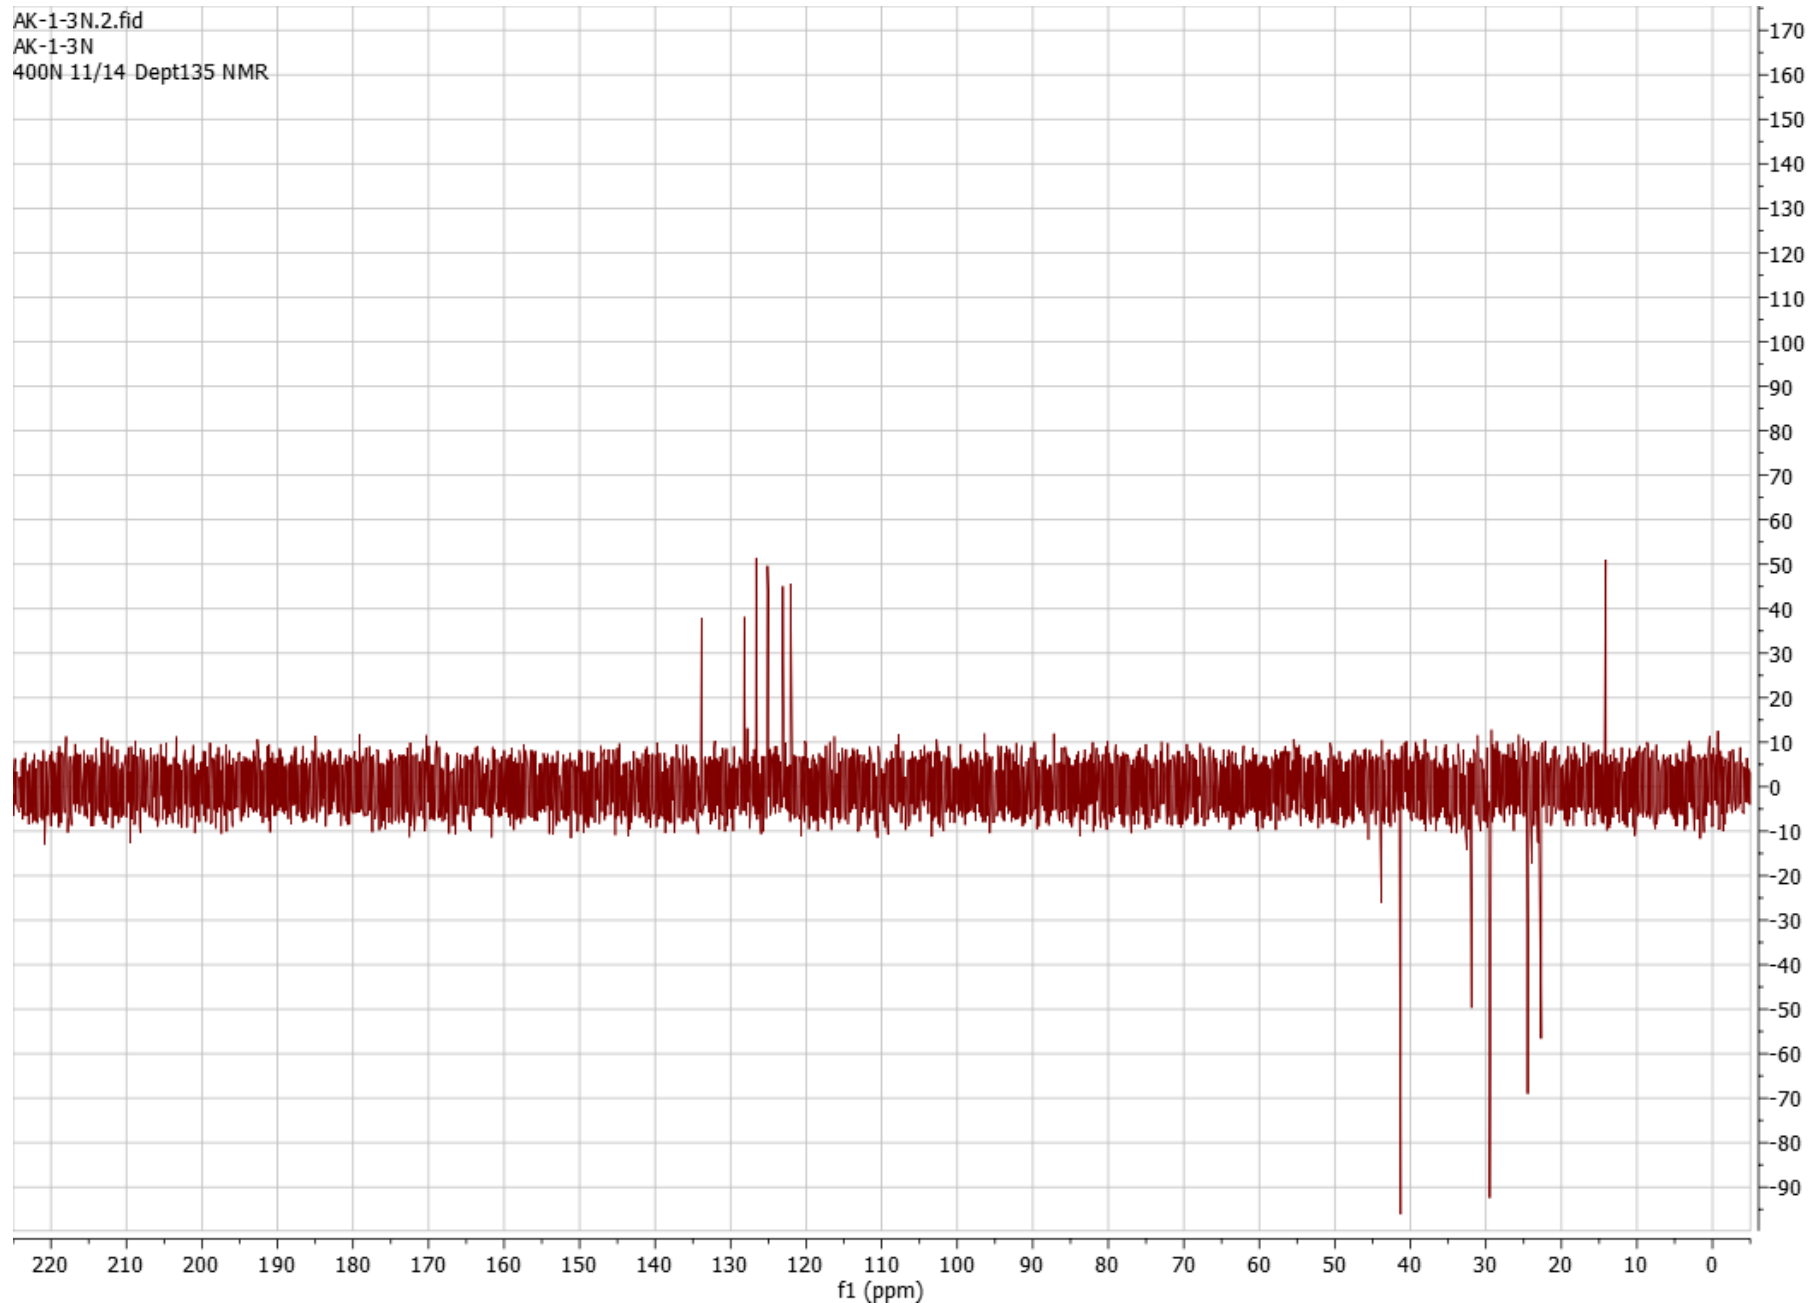

**Figure S14:** Dept-135 NMR spectrum of **2c** [400 MHz,  $\text{CDCl}_3$ ]

D:\msAxel@LP Data\Charles\_Cantrell\MI-AK-1-3 dartpos.txt

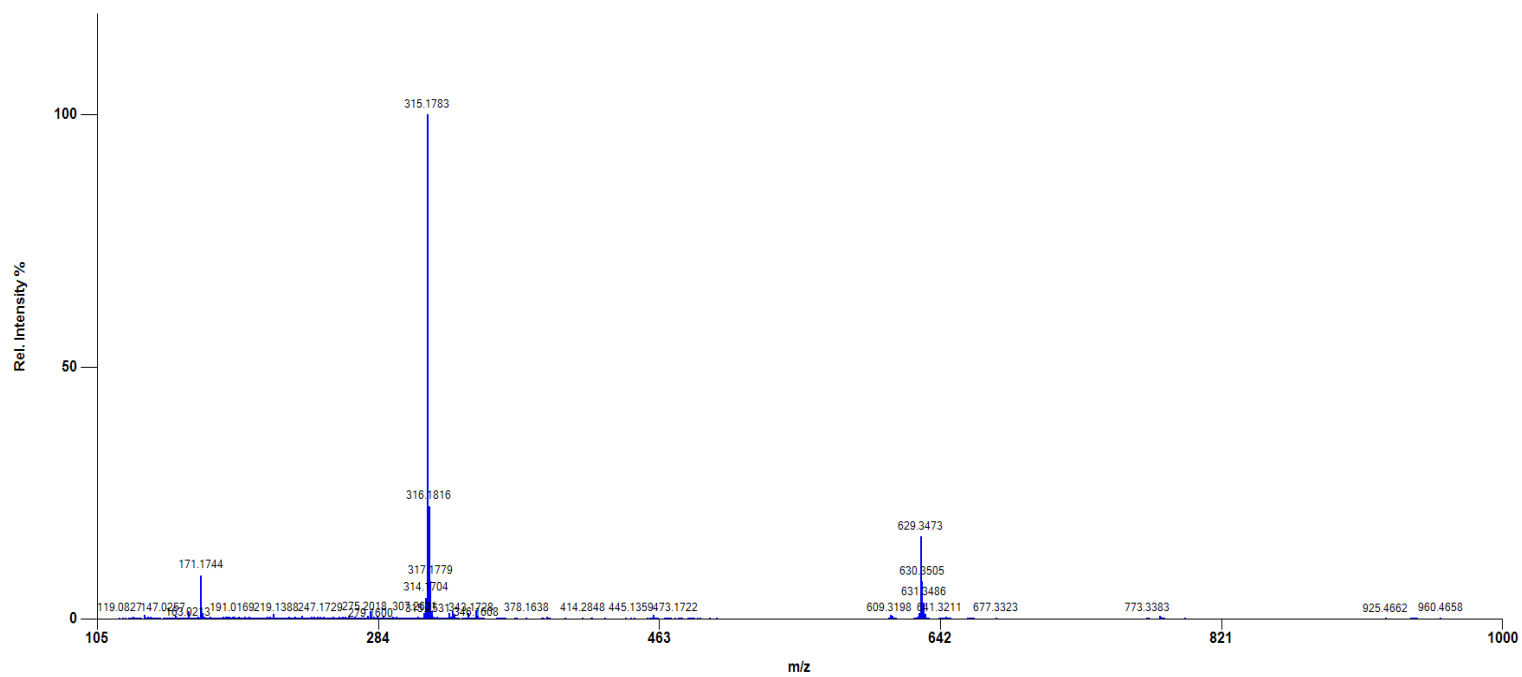

**Figure S15: HRMS of 2c**

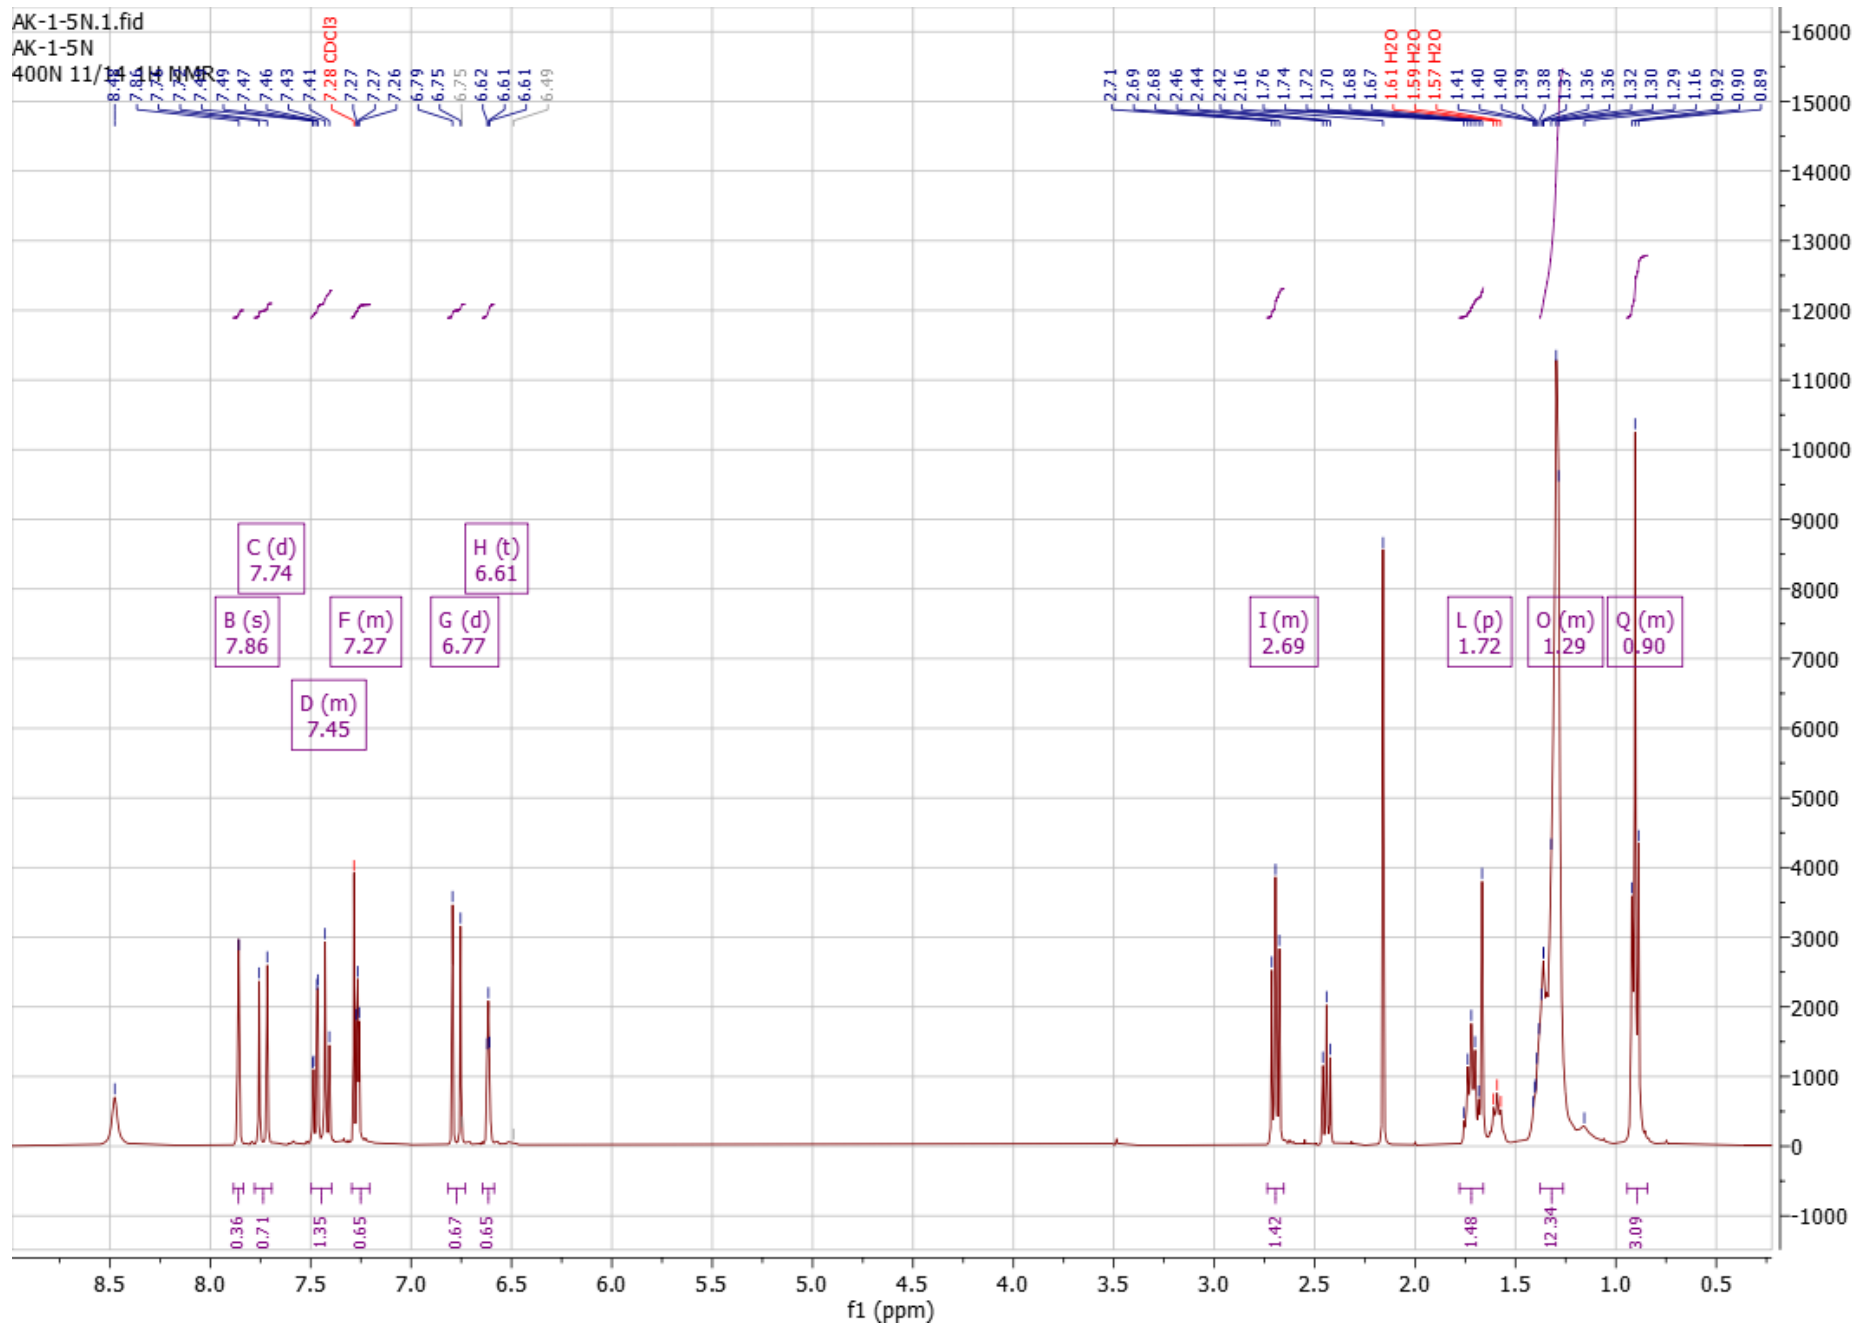

**Figure S16:**  $^1\text{H}$  NMR spectrum of **2d** [400 MHz,  $\text{CDCl}_3$ ]

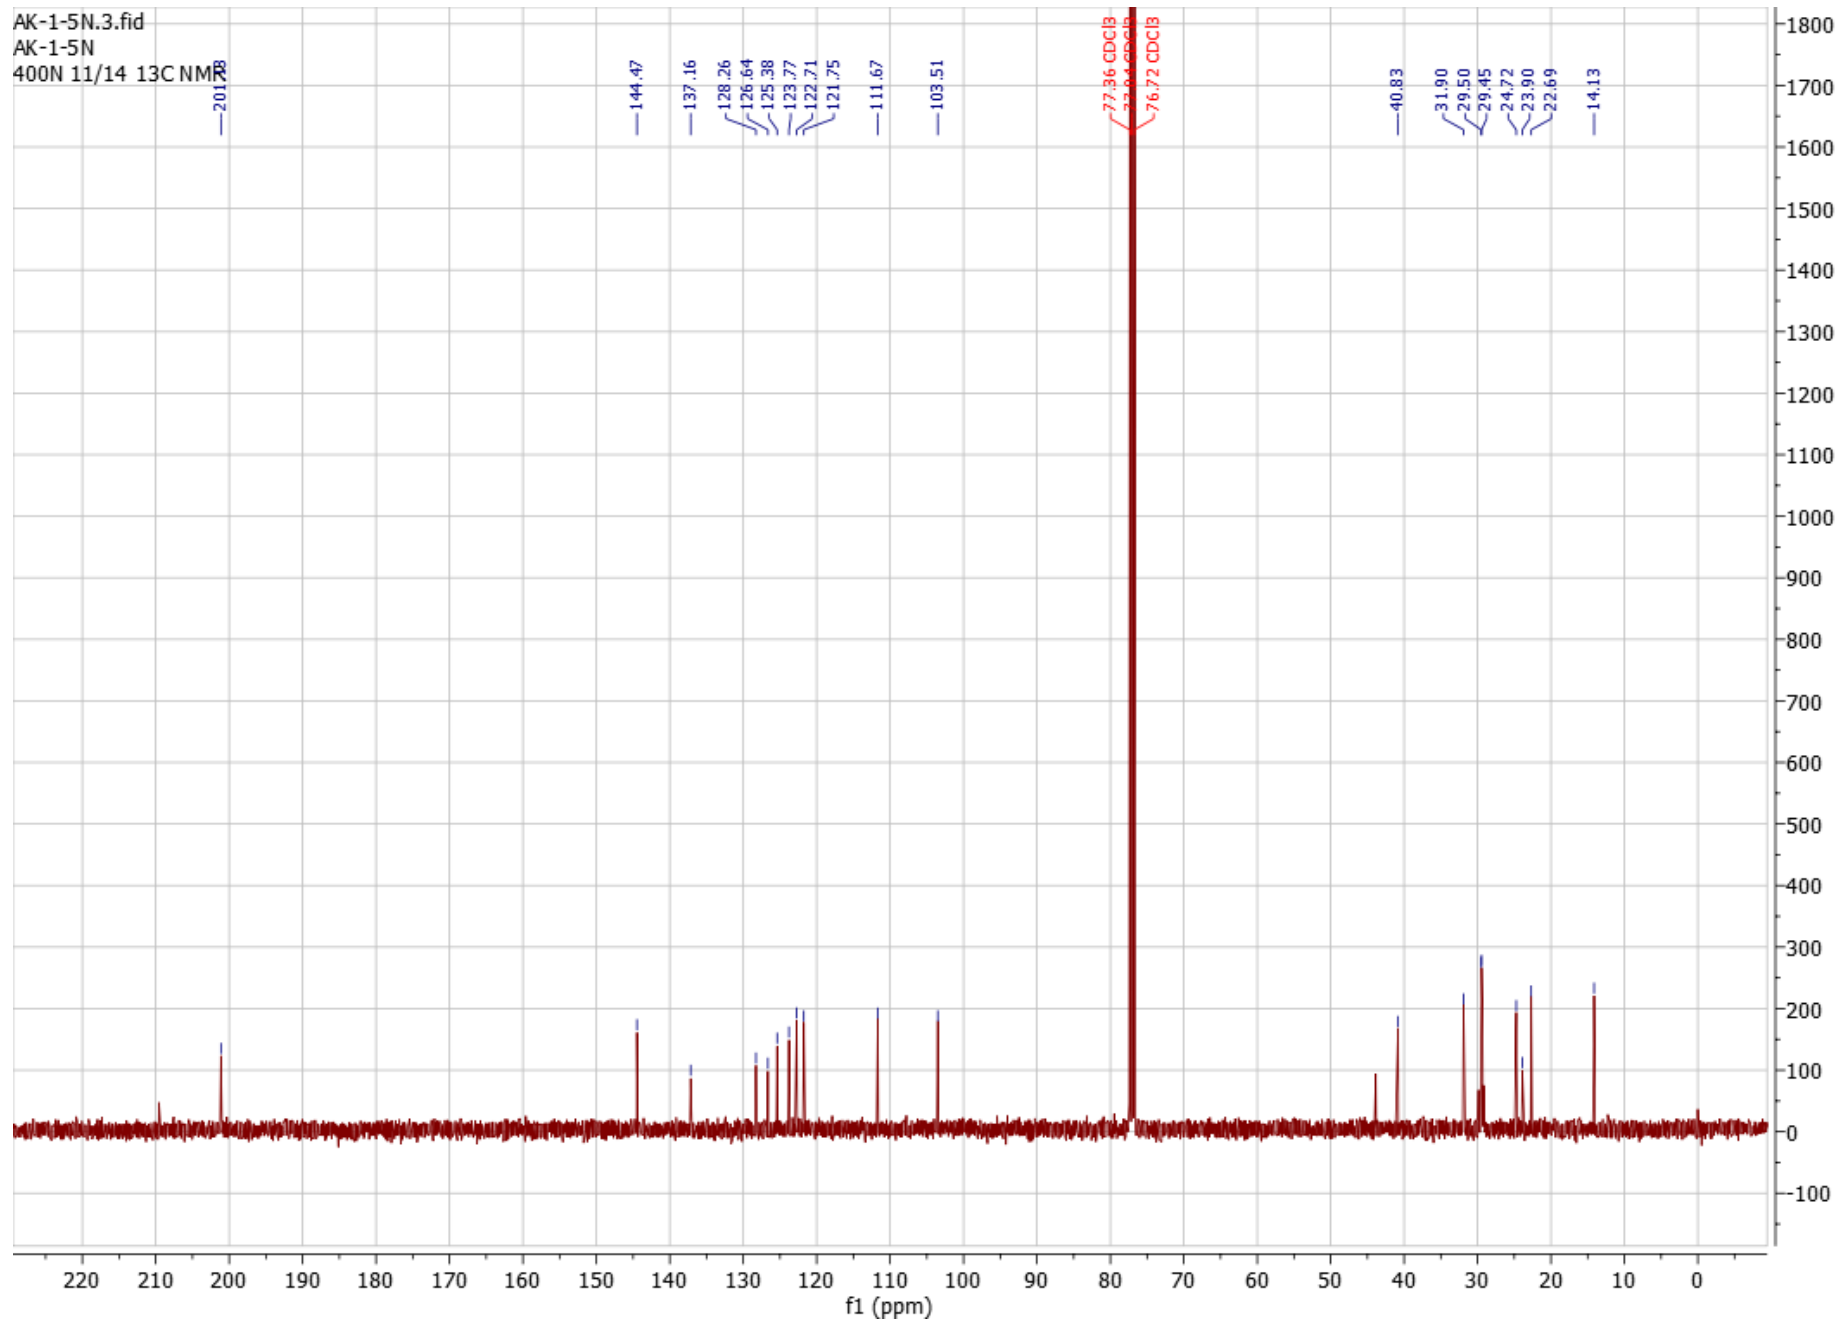

**Figure S17:**  $^{13}\text{C}$  NMR spectrum of **2d** [100 MHz,  $\text{CDCl}_3$ ]

AK-1-5N.2.fid  
AK-1-5N  
400N 11/14 Dept135 NMR

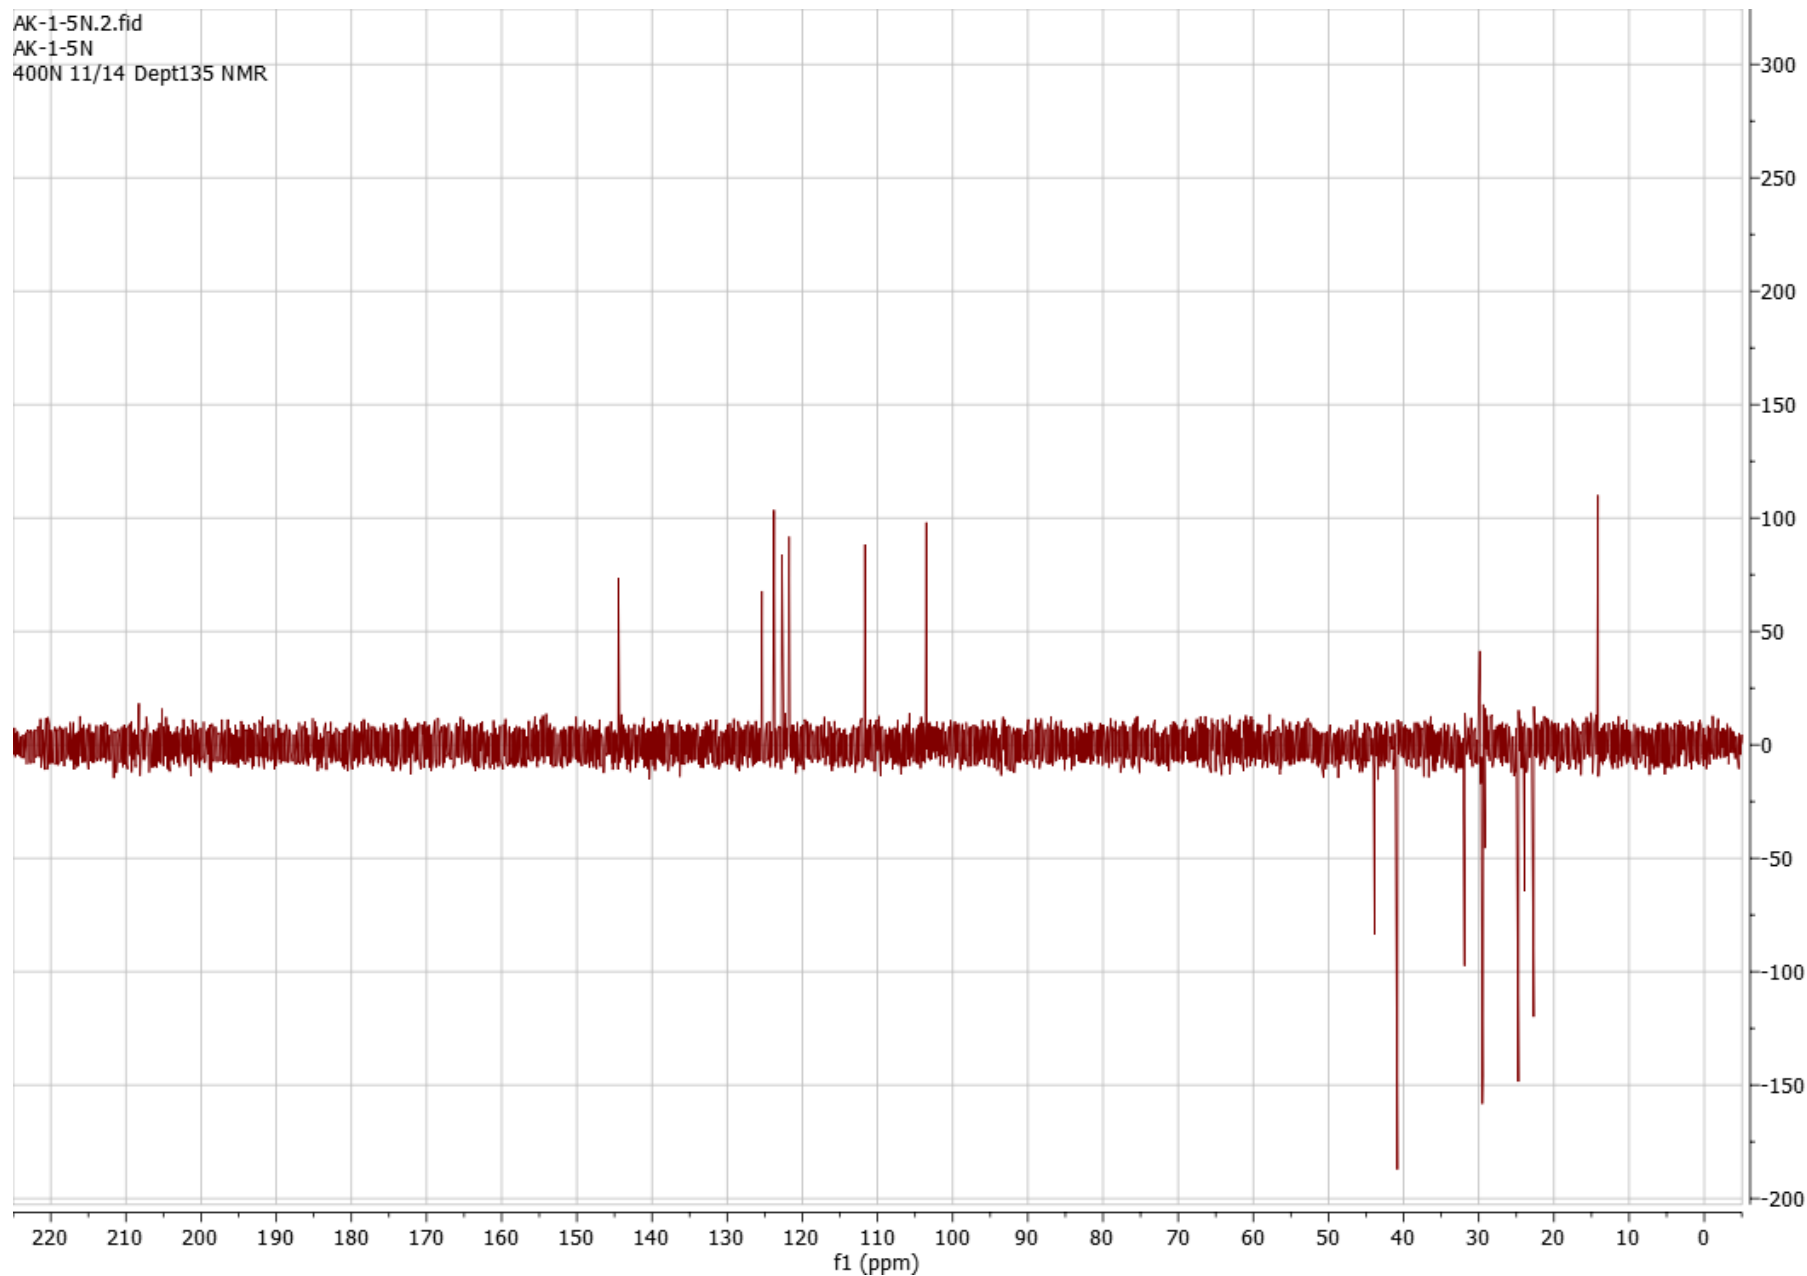

**Figure S18:** Dept-135 NMR spectrum of **2d** [400 MHz,  $\text{CDCl}_3$ ]

D:\msAxel@LP Data\Charles\_Cantrell\MI-AK-1-5 dartpos.txt

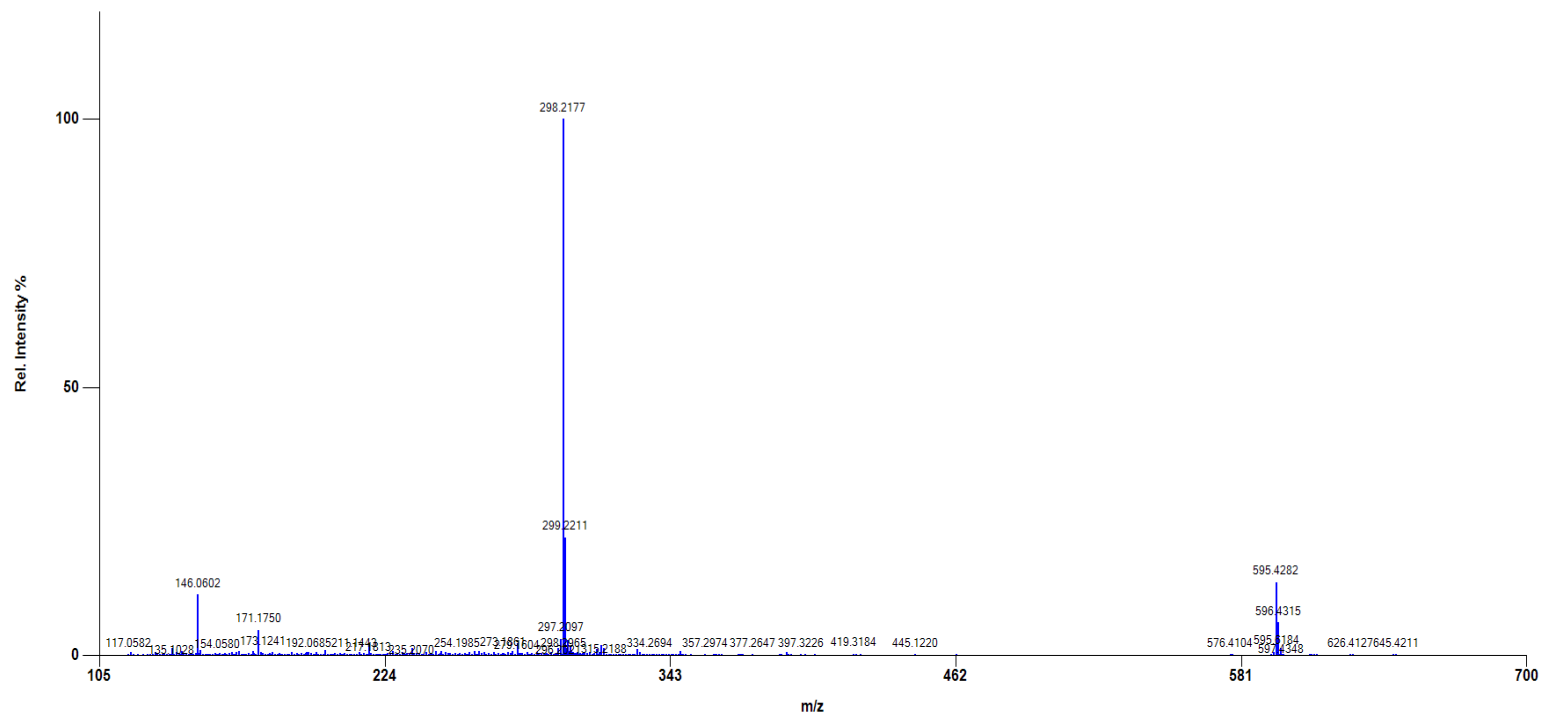

**Figure S19: HRMS of 2d**

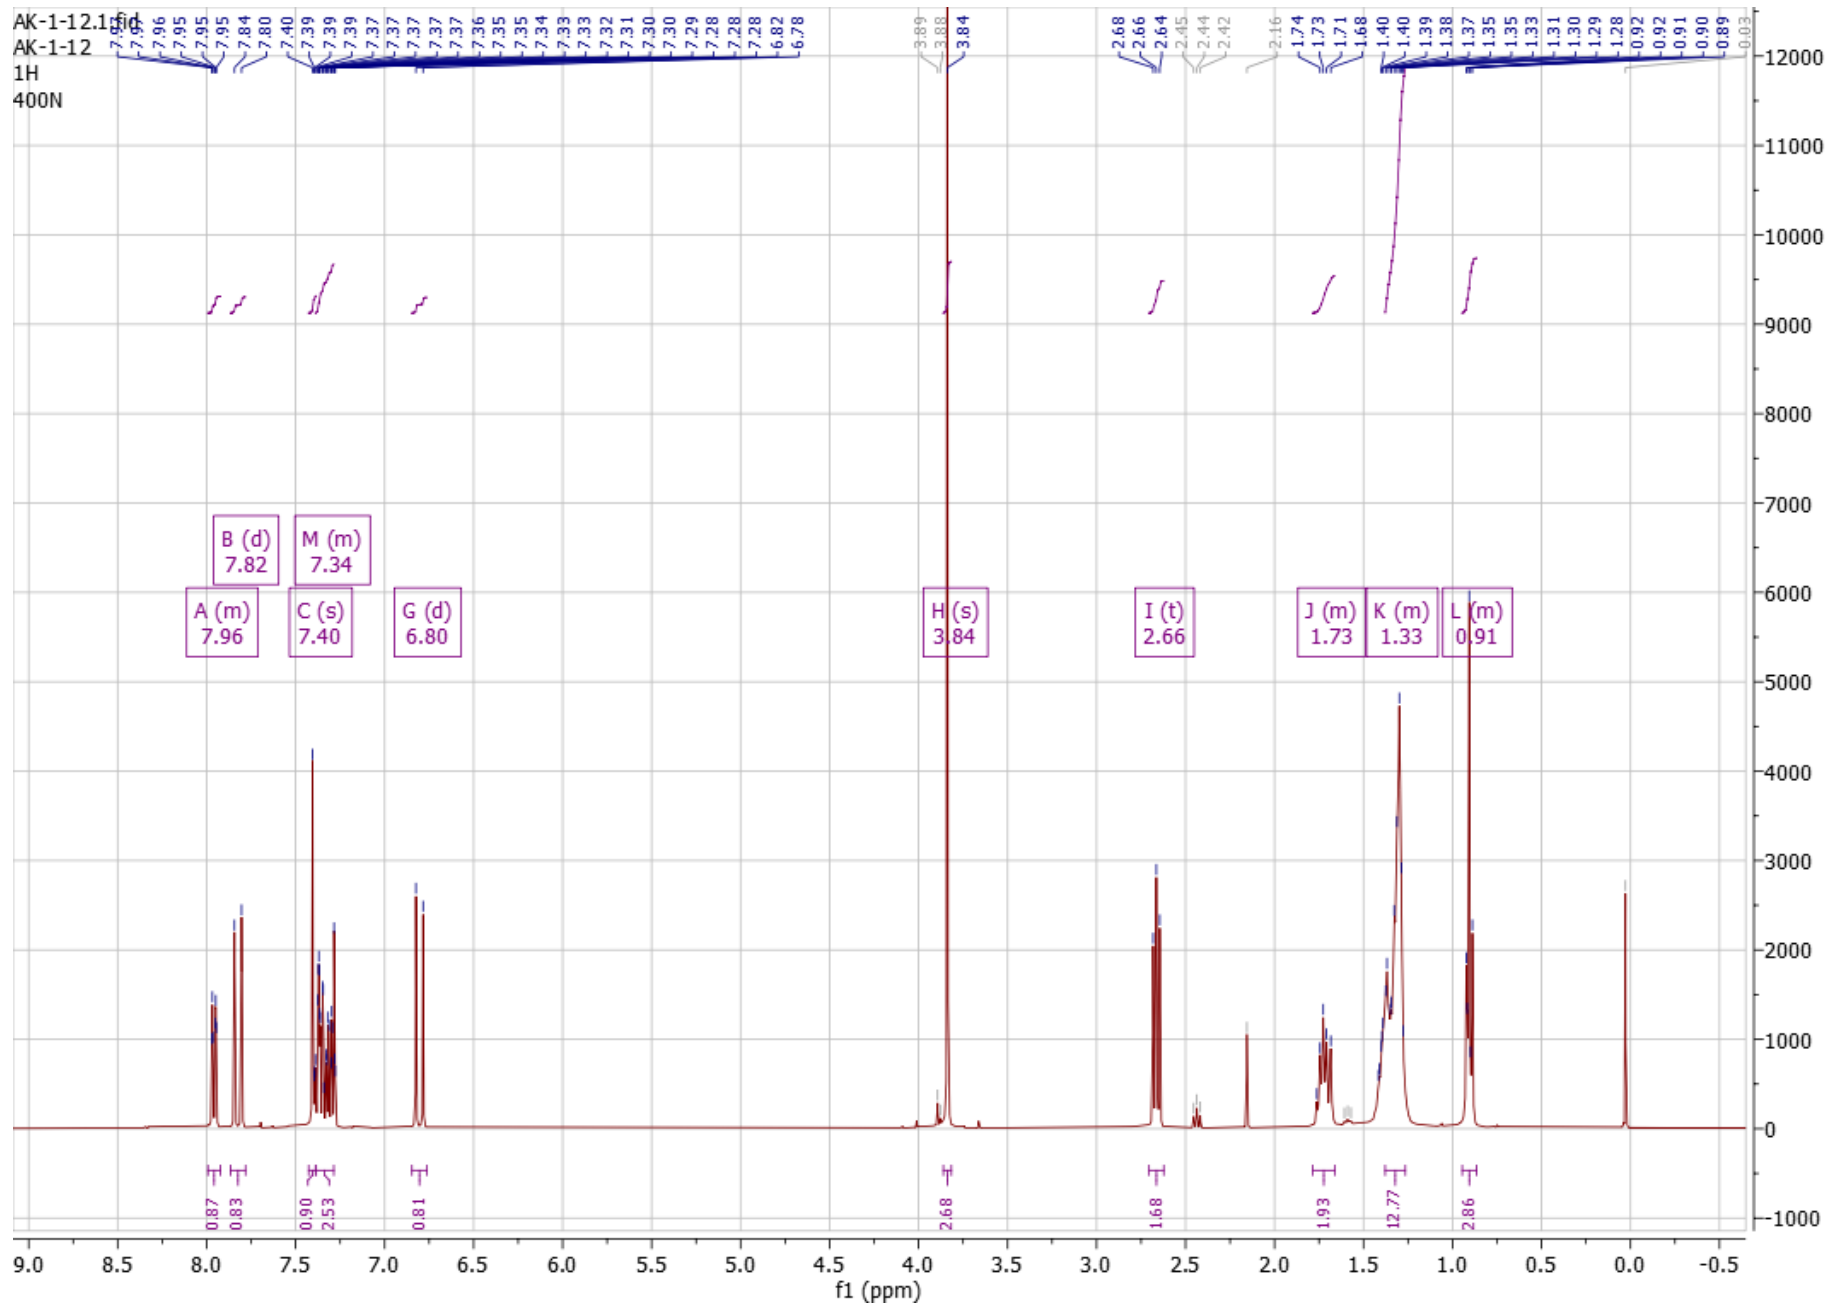

**Figure S20:**  $^1\text{H}$  NMR spectrum of **2e** [400 MHz,  $\text{CDCl}_3$ ]

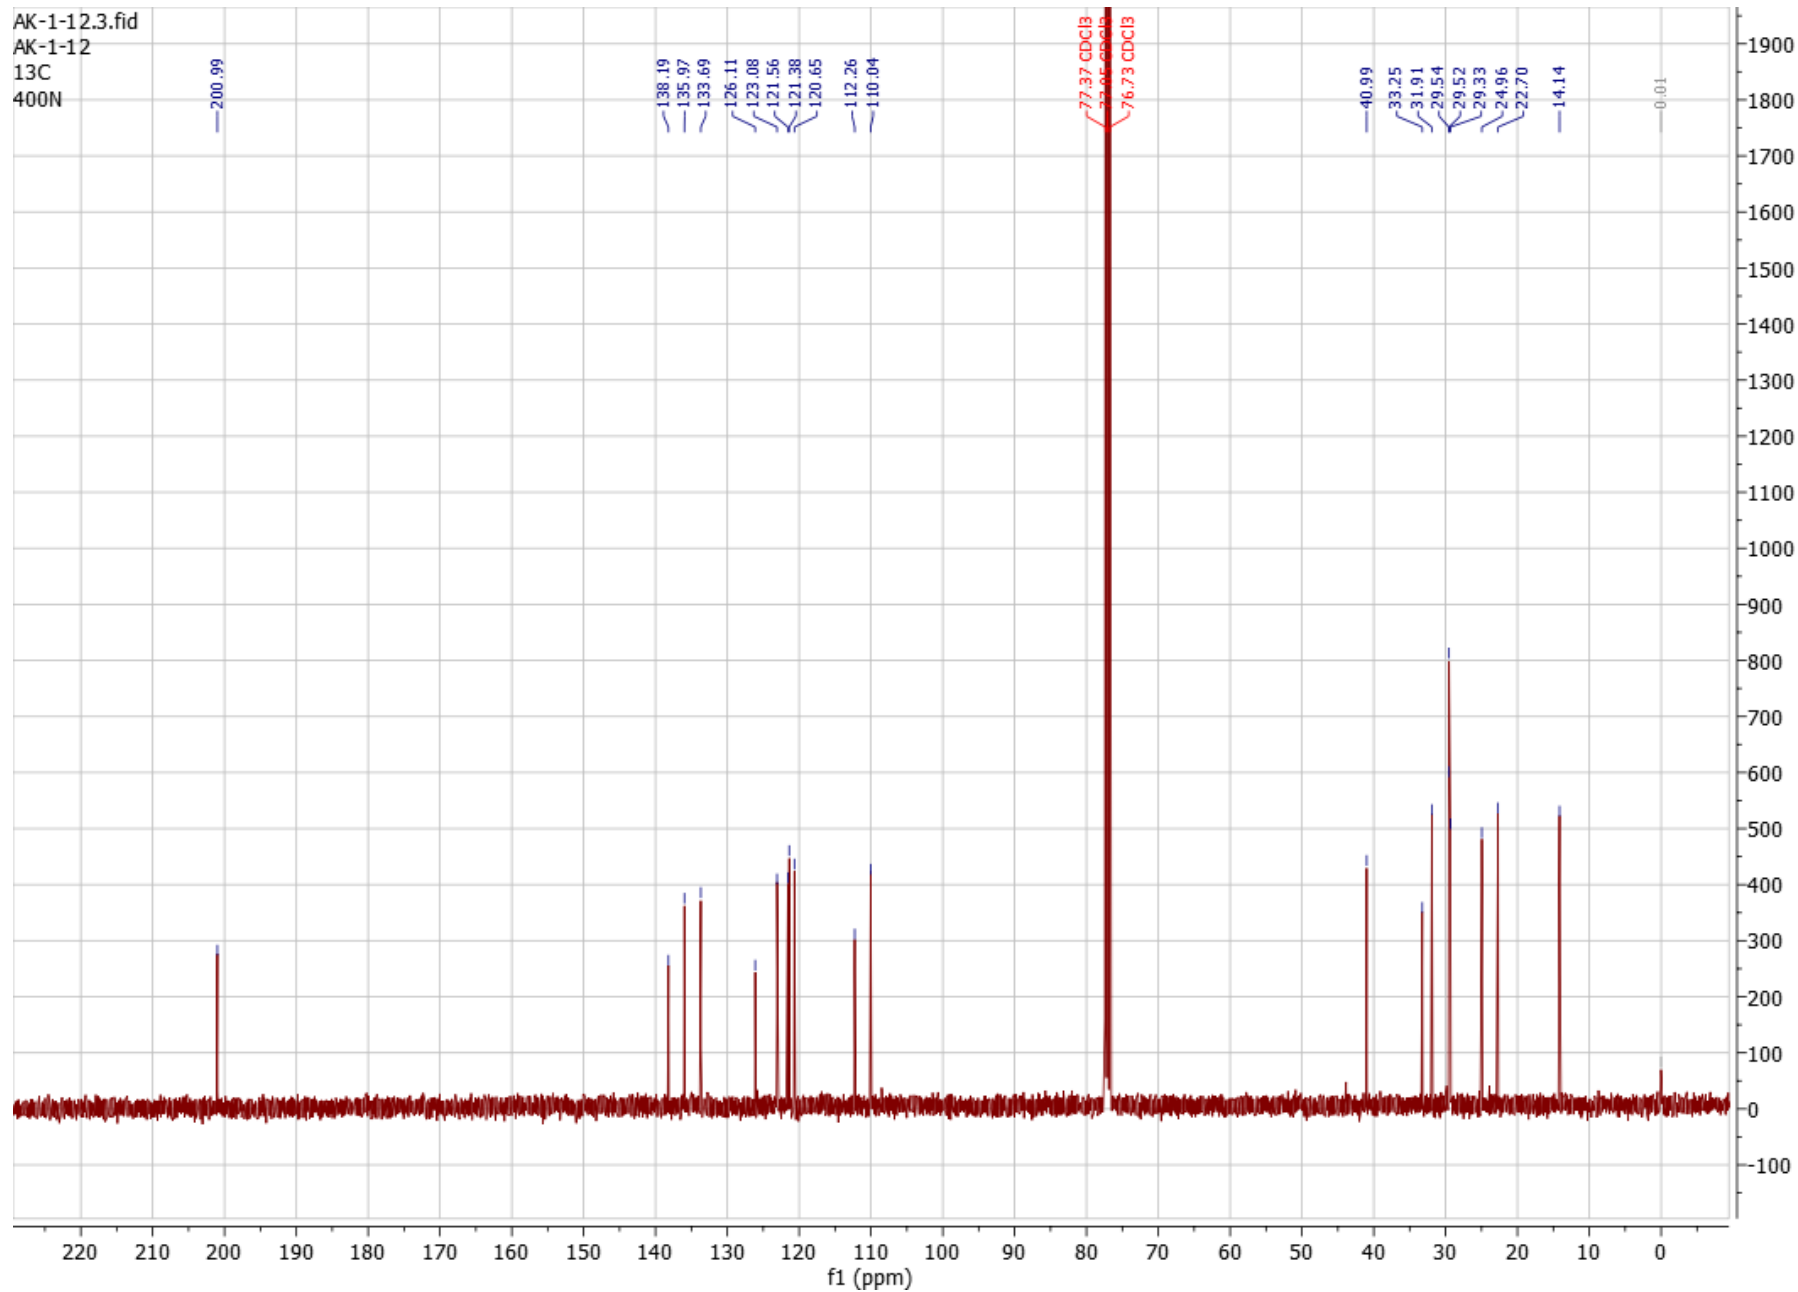

**Figure S21:** <sup>13</sup>C NMR spectrum of **2e** [100 MHz, CDCl<sub>3</sub>]



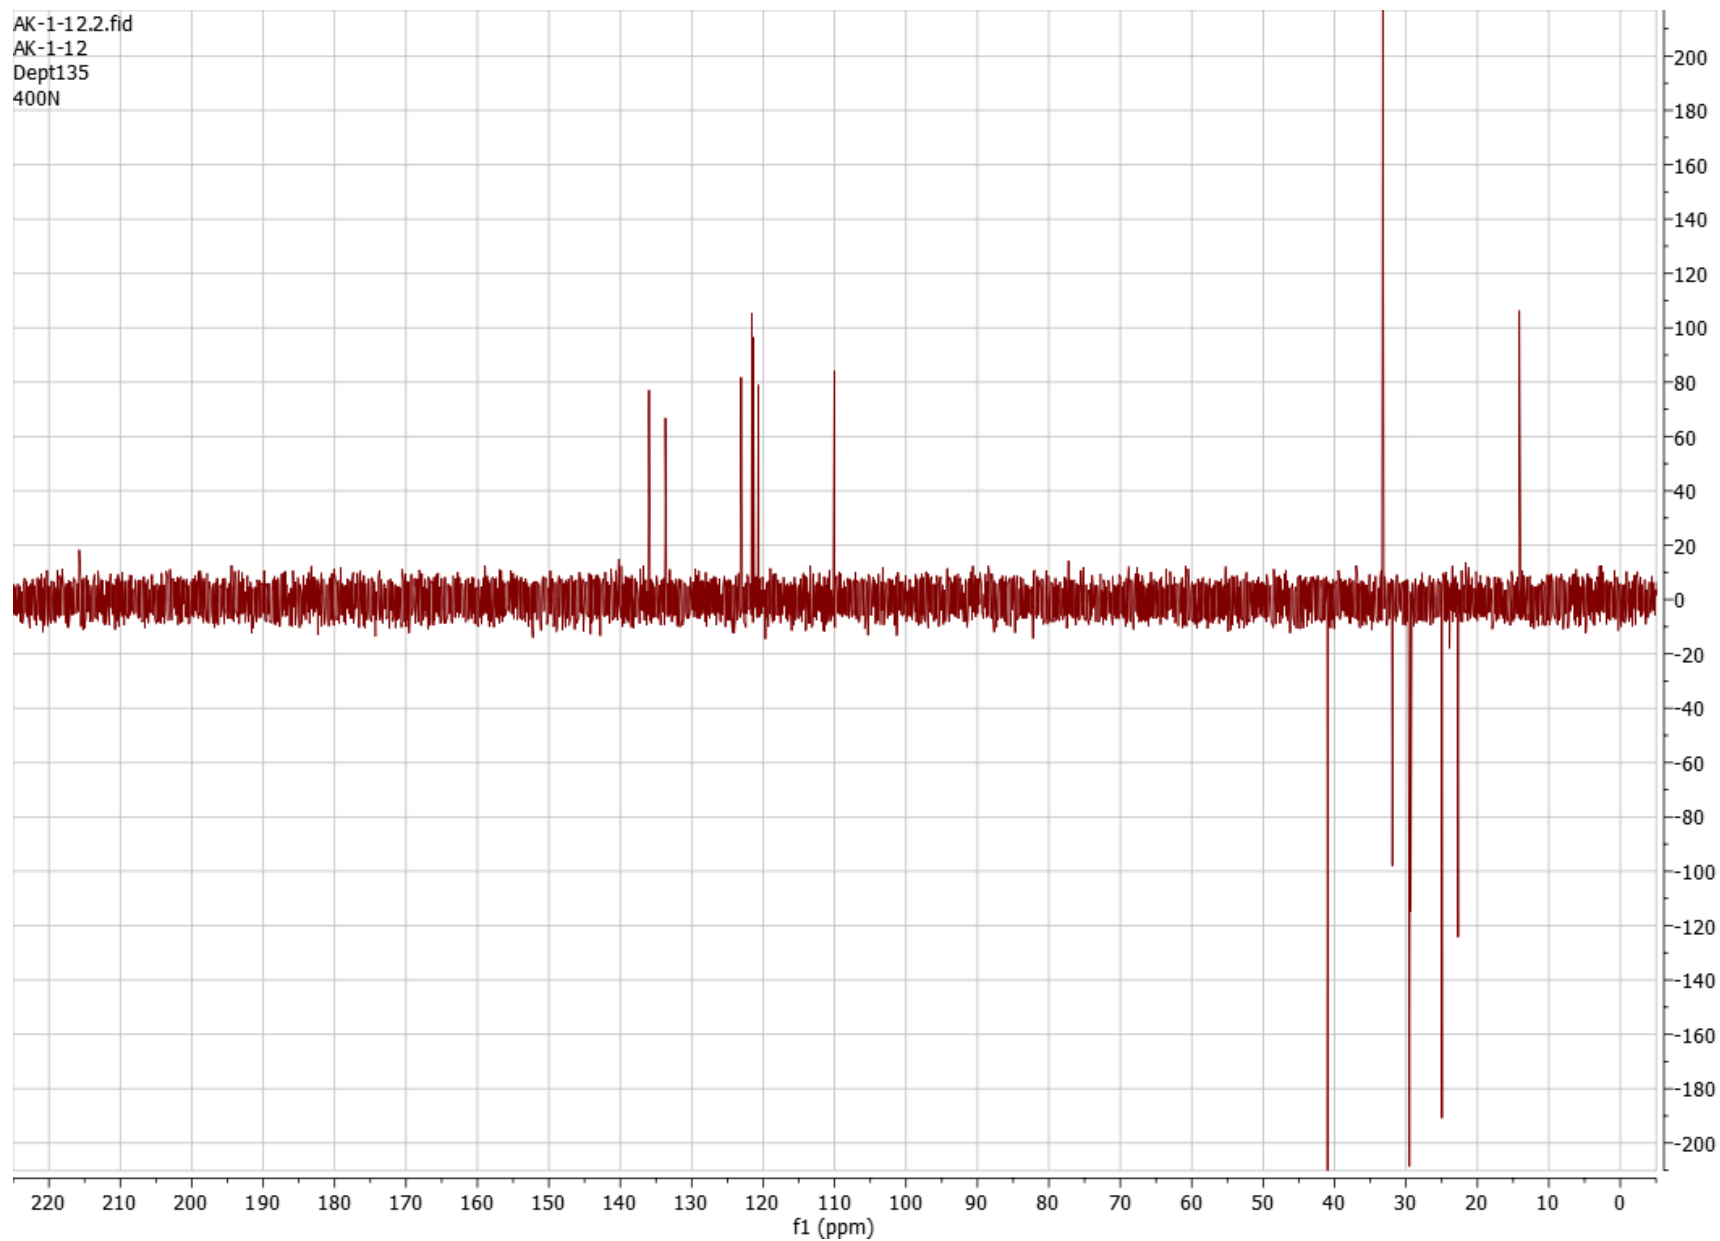

**Figure S22:** Dept-135 NMR spectrum of **2e** [400 MHz,  $\text{CDCl}_3$ ]

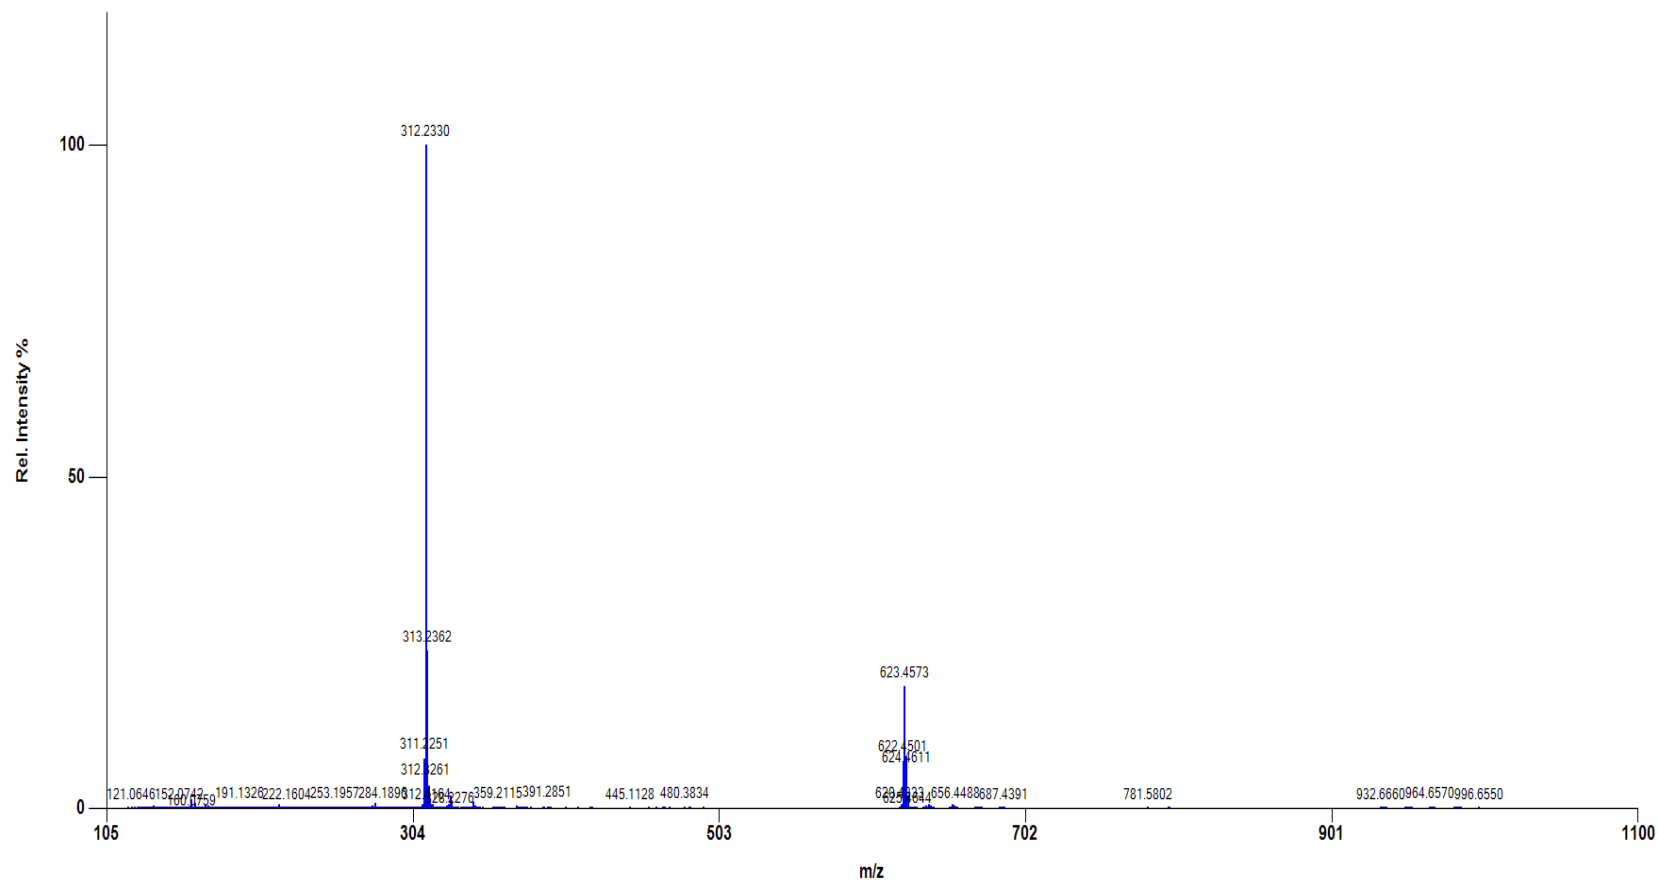

**Figure S23: HRMS of 2e**

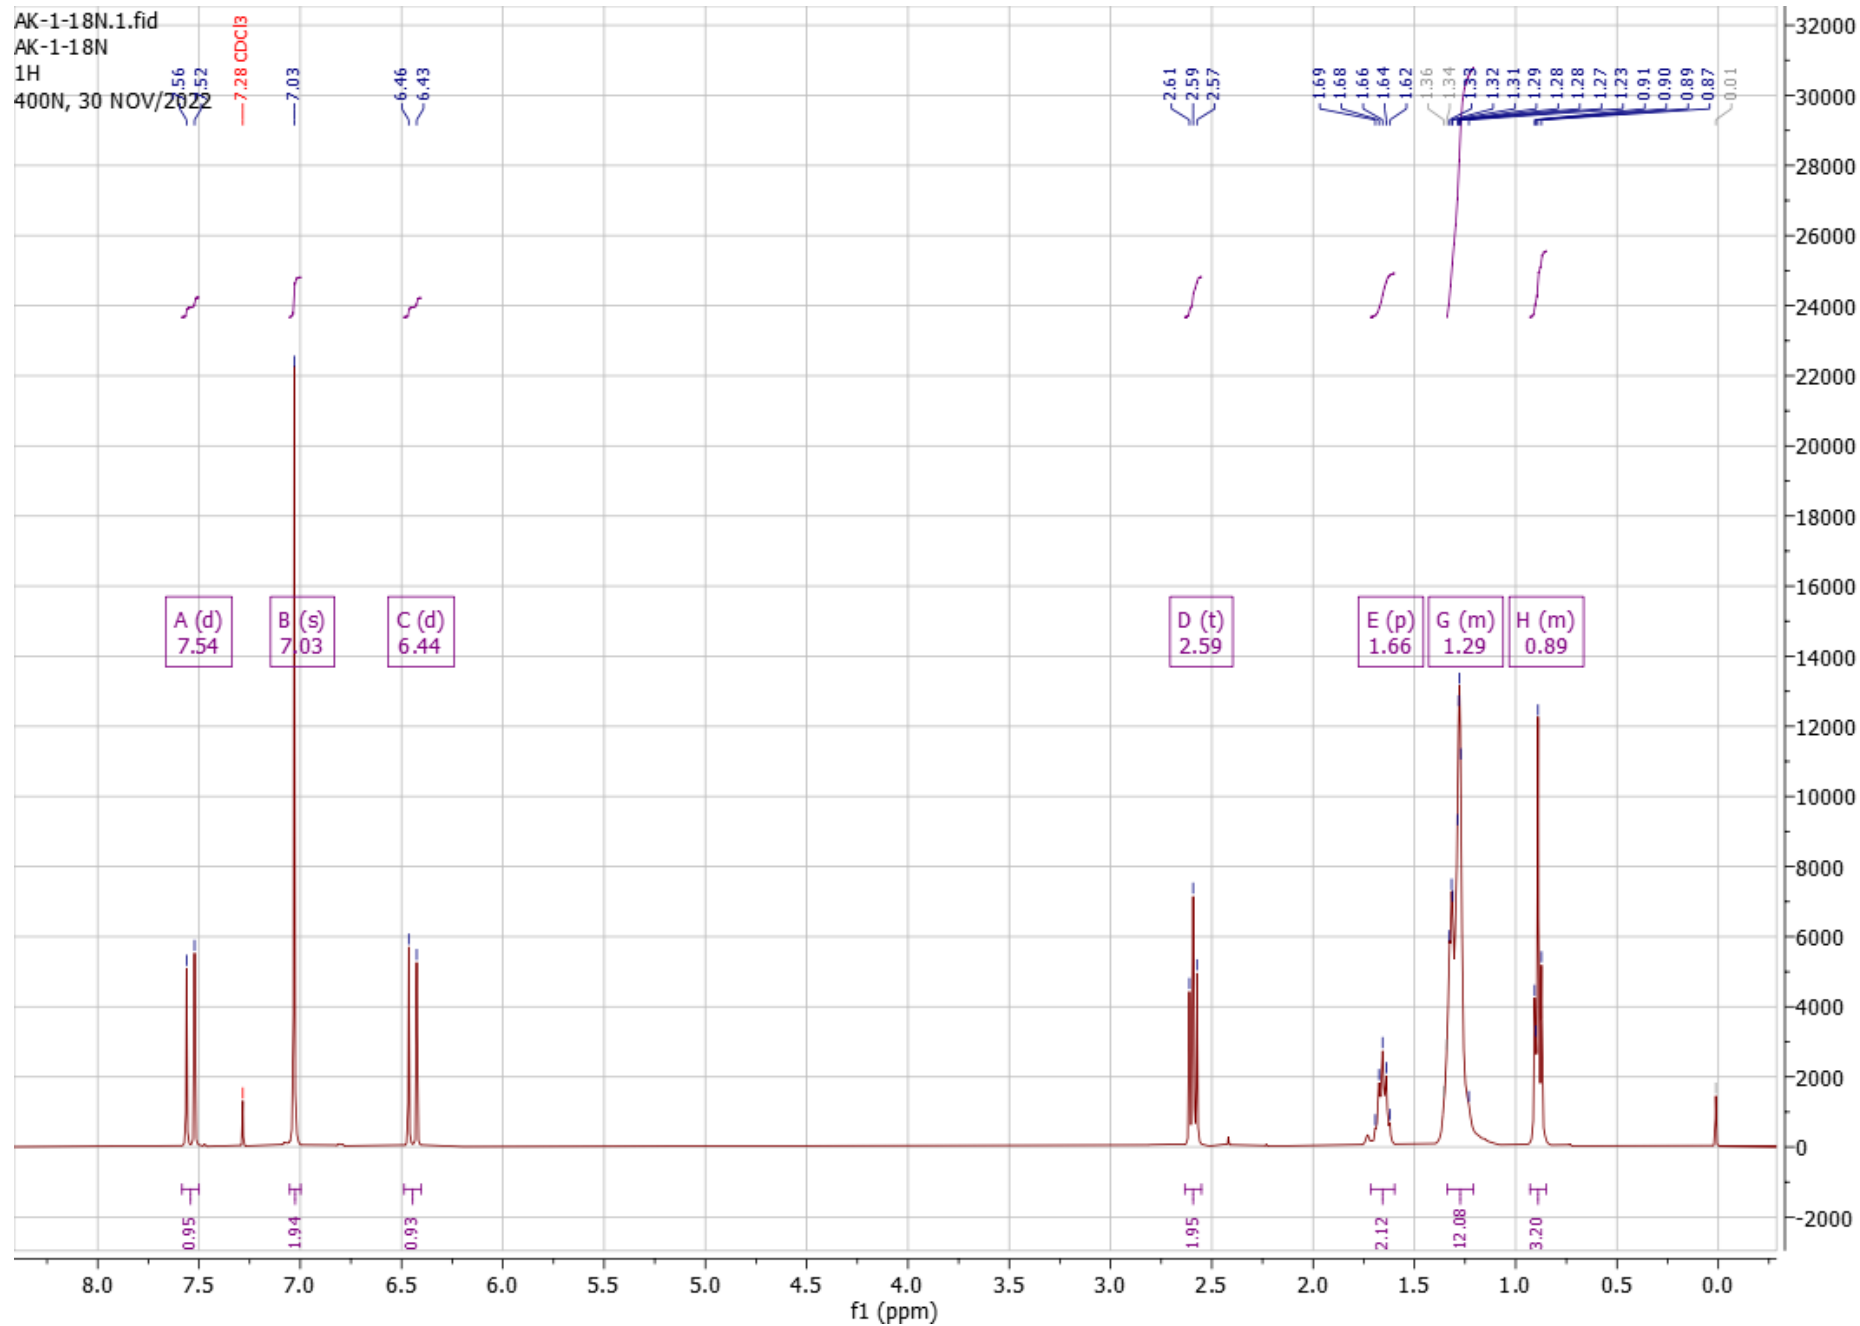

**Figure S24:** <sup>1</sup>H NMR spectrum of **2f** [400 MHz, CDCl<sub>3</sub>]

AK-1-18N.3.fid  
AK-1-18N  
13C  
400N, 30 NOV/2022

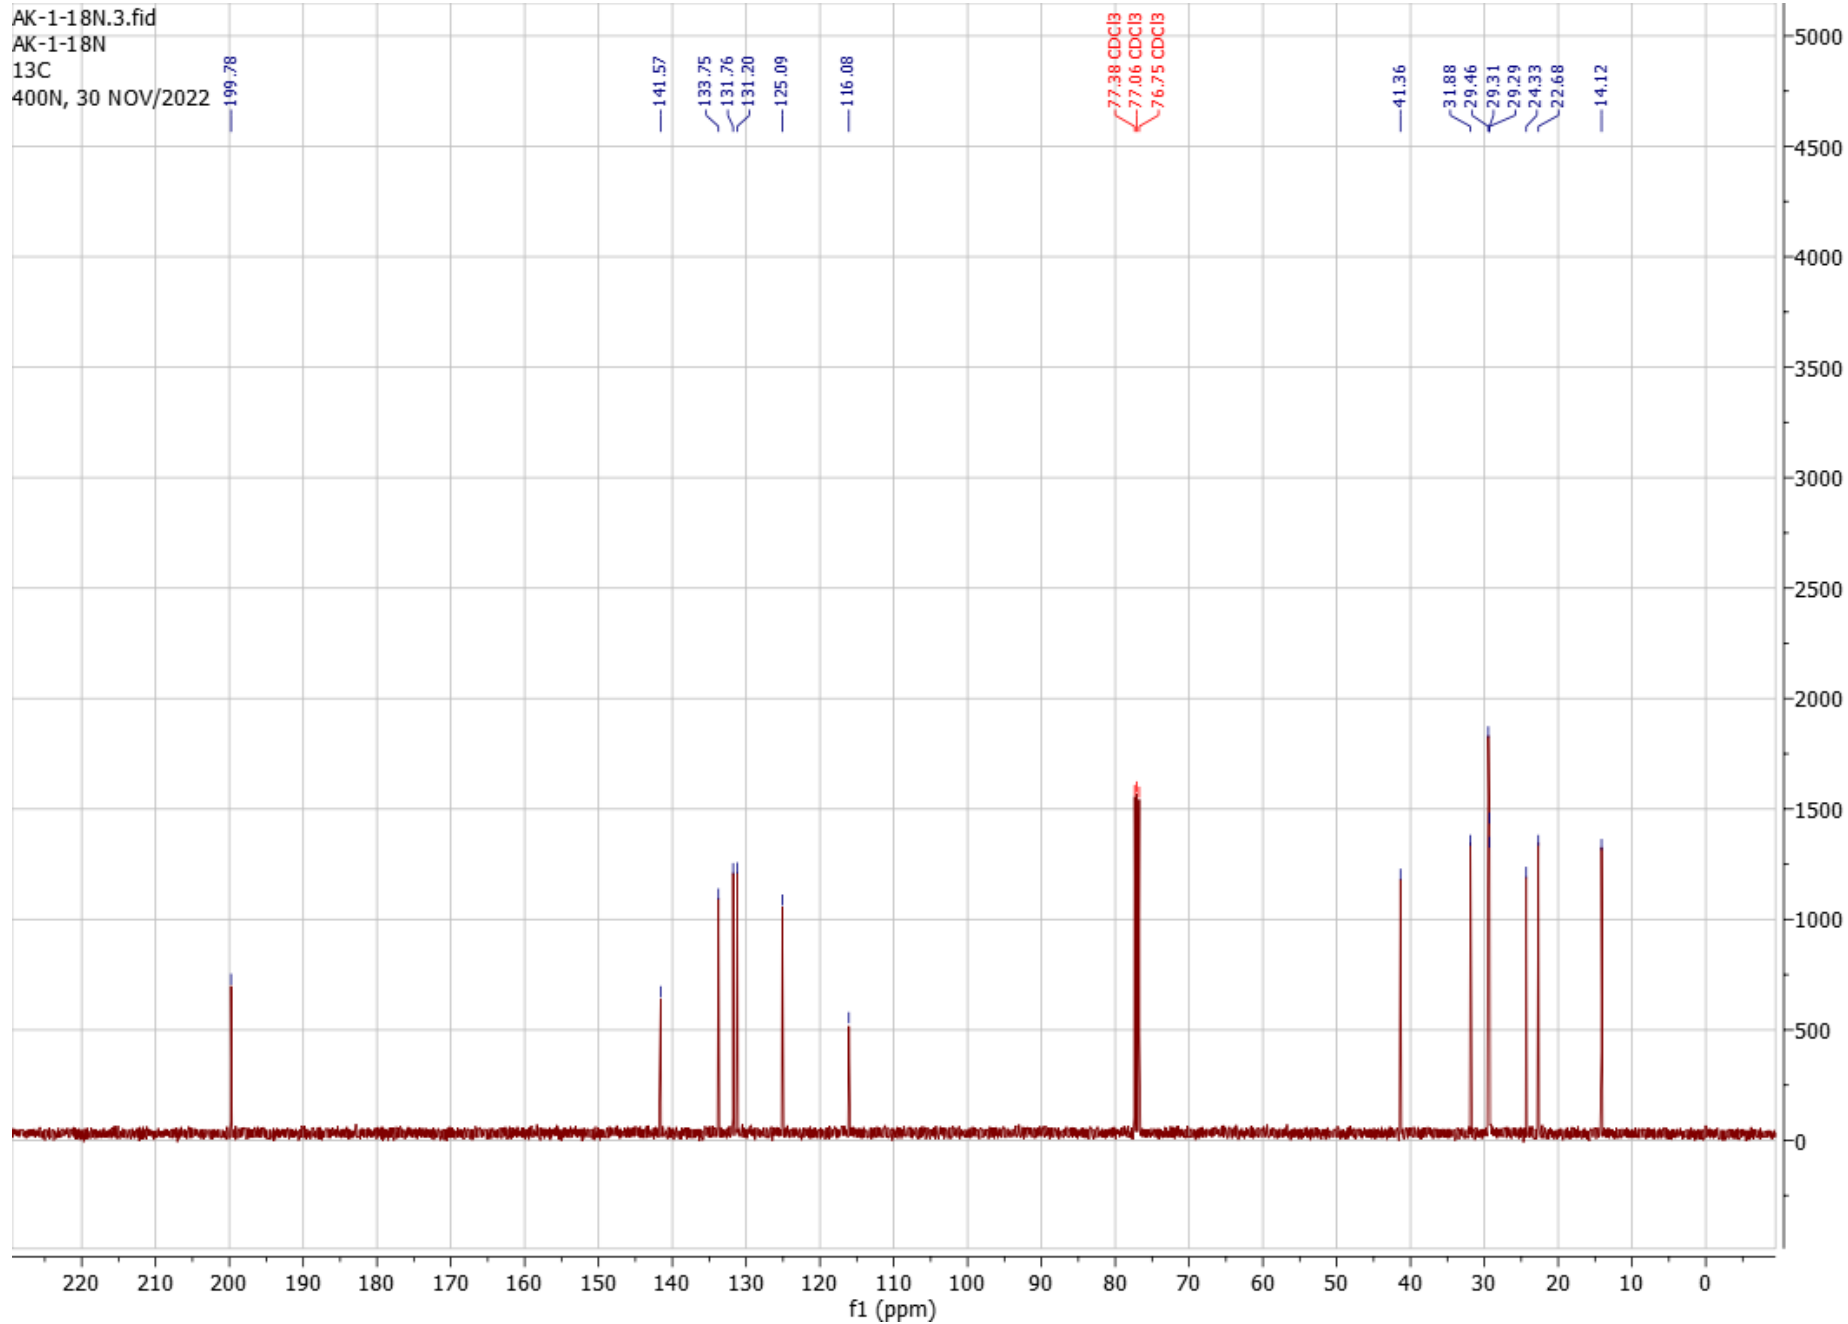

**Figure S25:** <sup>13</sup>C NMR spectrum of **2f** [100 MHz, CDCl<sub>3</sub>]

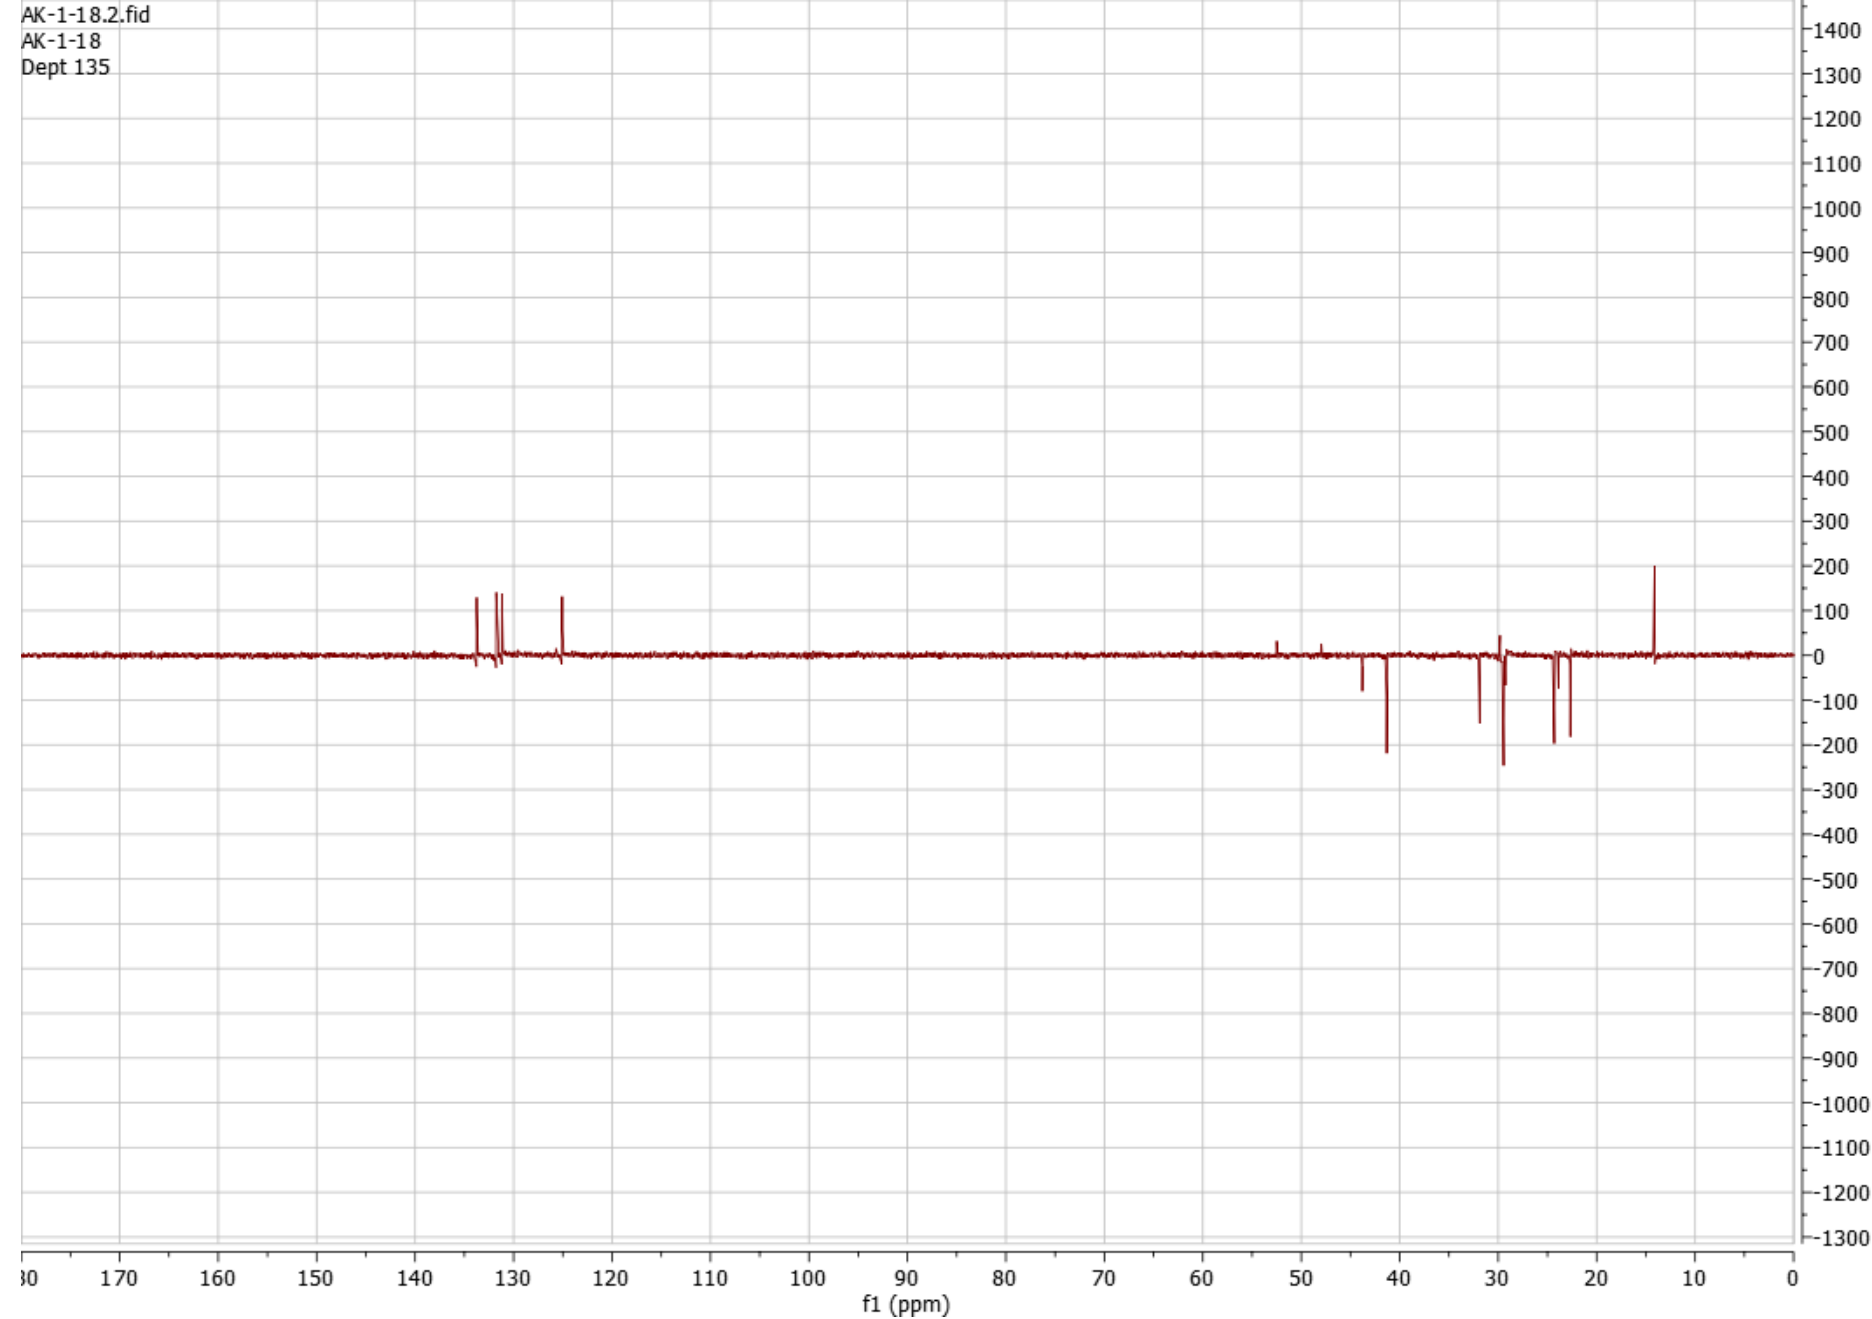

**Figure S26:** Dep-135 NMR spectrum of **2f** [400 MHz, CDCl<sub>3</sub>]

D:\msAxel@LP Data\Charles\_Cantrell\MI-AK-1-18 dartpos.txt

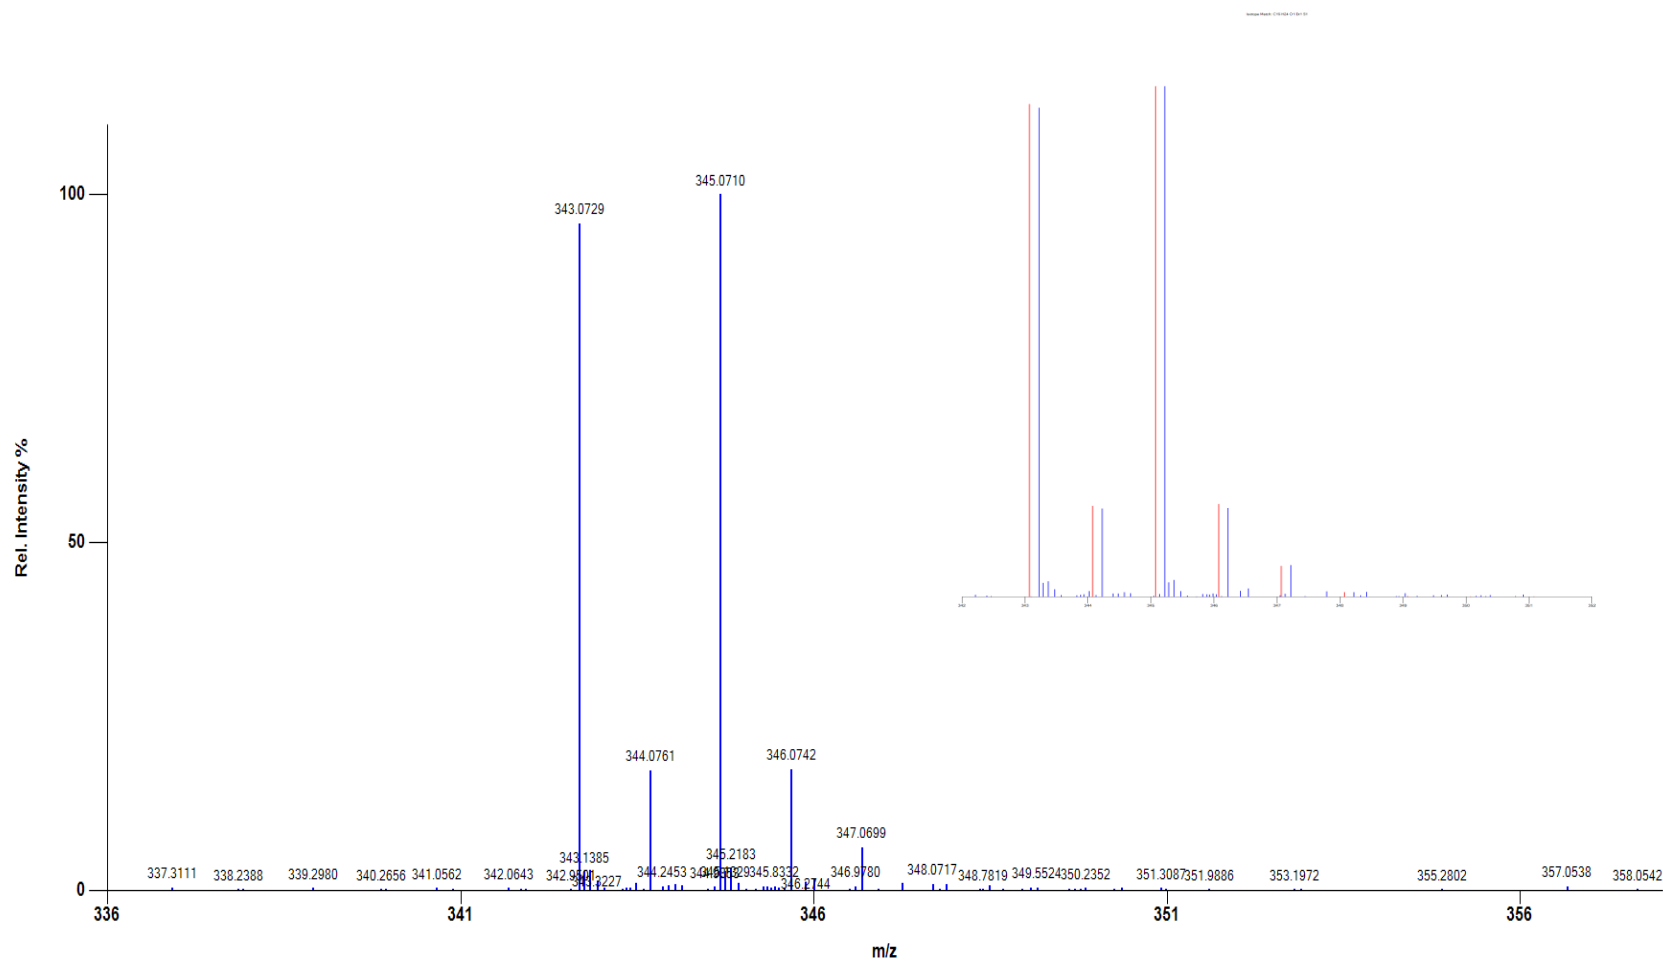

**Figure S27: HRMS of 2f**
